# Supplementary material
Source: PubMed Central journal article supplement (PMC2776381)

# Copper-Mediated Amidation of Heterocyclic and Aromatic

## C-H Bonds

*Qiu Wang and Stuart L. Schreiber\**

*Howard Hughes Medical Institute, Broad Institute, Cambridge, MA 02142;  
Department of Chemistry and Chemical Biology, Harvard University, Cambridge,  
MA 02138*

### Supporting Information

#### Content:

|                                                  |        |
|--------------------------------------------------|--------|
| Material and method                              | S1     |
| Supplementary tables for condition optimizations | S2     |
| General experimental procedure                   | S3     |
| Characterization data of new compounds           | S3-S8  |
| <sup>1</sup> H and <sup>13</sup> C NMR spectra   | S9-S38 |

#### Material and Method.

Except as otherwise noted, commercial reagents and solvents were used as received without further purification. Proton nuclear magnetic resonance (<sup>1</sup>H NMR) spectra and carbon nuclear magnetic resonance (<sup>13</sup>C NMR) spectra were recorded with Varian Unity/Inova 500 (500 MHz/125 MHz) or Bruker Biospin 300 (300 MHz/75 MHz) spectrometer. Fluoride nuclear magnetic resonance (<sup>19</sup>F NMR) spectra were recorded with Bruker Biospin 300 (282 MHz). Chemical shifts for protons are reported in parts per million ( $\delta$  scale) and are referenced to residual protium in the NMR solvents (CHCl<sub>3</sub>:  $\delta$  7.27, D<sub>2</sub>HCO:  $\delta$  3.31). Chemical shifts for carbon are reported in parts per million ( $\delta$  scale) and are referenced to the carbon resonances of the solvent (CDCl<sub>3</sub>:  $\delta$  77.0, CD<sub>3</sub>OD:  $\delta$  49.1, (CD<sub>3</sub>)<sub>2</sub>SO:  $\delta$  40.5). Data are represented as follows: chemical shift, multiplicity (s = singlet, d = doublet, t = triplet, q = quartet, m = multiplet, br = broad), coupling constant in Hz, and integration. Infrared spectra were recorded using a Perkin-Elmer FT-IR spectrometer (thin film or neat, as indicated). High-resolution mass spectra were obtained through the Harvard University mass spectrometry facilities. Analytical thin-layer chromatography was performed using glass plates pre-coated with 0.25 mm 230-400 mesh silica gel impregnated with a fluorescent indicator (254 nm). Flash chromatography was performed on a CombiFlash companion system (Teledyne ISCO, Inc.) with pre-packed FLASH silica gel columns (Biotage, Inc.).

Supplementary tables.

Table S1. Selected screening results for coupling reaction of **1** with amide nucleophile **2a**.

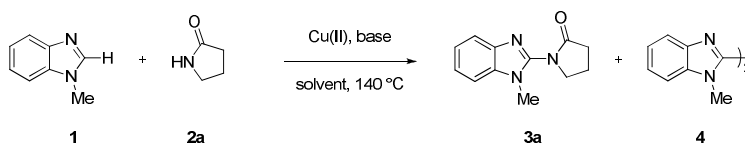

| Entry | Reaction condition (equiv of the reagents)                                                                                      | Solvent        | Time                    | Yield <sup>b</sup> of <b>3a/4/1</b> (%) |
|-------|---------------------------------------------------------------------------------------------------------------------------------|----------------|-------------------------|-----------------------------------------|
| 1     | <b>1</b> (1.0), <b>2a</b> (2.0), Cu(OAc) <sub>2</sub> (0.2), Na <sub>2</sub> CO <sub>3</sub> (2.0)                              | Toluene        | 24 h                    | 10/-/81                                 |
| 2     | <b>1</b> (1.0), <b>2a</b> (2.0), Cu(OAc) <sub>2</sub> (0.2), Na <sub>2</sub> CO <sub>3</sub> (2.0), Pyr. (5.0)                  | Toluene        | 24 h                    | 58/30/-                                 |
| 3     | <b>1</b> (1.0), <b>2a</b> (5.0), Cu(OAc) <sub>2</sub> (0.2), Na <sub>2</sub> CO <sub>3</sub> (2.0), Pyr. (5.0)                  | Toluene        | 24 h                    | 16/-/79                                 |
| 4     | <b>1</b> (1.0), <b>2a</b> (5.0), Cu(OAc) <sub>2</sub> (0.2), Na <sub>2</sub> CO <sub>3</sub> (2.0), pyr. (10.0)                 | Toluene        | 36 h <sup>c</sup>       | 88 <sup>d</sup> /6/-                    |
| 5     | <b>1</b> (1.0), <b>2a</b> (5.0), Cu(OAc) <sub>2</sub> (0.2), Na <sub>2</sub> CO <sub>3</sub> (2.0), pyr. (20.0)                 | <b>Toluene</b> | <b>12 h<sup>c</sup></b> | <b>82<sup>d</sup>/10/-</b>              |
| 6     | <b>1</b> (1.0), <b>2a</b> (5.0), Cu(OAc) <sub>2</sub> (1.0), Na <sub>2</sub> CO <sub>3</sub> (2.0), pyr. (20.0)                 | Toluene        | 4 h <sup>c</sup>        | 65 <sup>d</sup> /23/-                   |
| 7     | <b>1</b> (1.0), <b>2a</b> (5.0), CuCl <sub>2</sub> (0.2), Na <sub>2</sub> CO <sub>3</sub> (2.0), pyr. (20.0)                    | Toluene        | 16 h                    | 74/-/12                                 |
| 8     | <b>1</b> (1.0), <b>2a</b> (5.0), CuBr <sub>2</sub> (0.2), Na <sub>2</sub> CO <sub>3</sub> (2.0), pyr. (20.0)                    | Toluene        | 16 h                    | 9/-/56                                  |
| 9     | <b>1</b> (1.0), <b>2a</b> (5.0), Cu(OTf) <sub>2</sub> (0.2), Na <sub>2</sub> CO <sub>3</sub> (2.0), pyr. (20.0)                 | Toluene        | 16 h                    | 28/-/52                                 |
| 10    | <b>1</b> (1.0), <b>2a</b> (5.0), Cu(OCOCF <sub>3</sub> ) <sub>2</sub> (0.2), Na <sub>2</sub> CO <sub>3</sub> (2.0), pyr. (20.0) | Toluene        | 16 h                    | 13/-/81                                 |
| 11    | <b>1</b> (1.0), <b>2a</b> (5.0), Cu(OAc) <sub>2</sub> (0.2), Na <sub>2</sub> CO <sub>3</sub> (2.0), lutidine (20.0)             | Toluene        | 16 h                    | 14/-/81                                 |
| 12    | <b>1</b> (1.0), <b>2a</b> (5.0), Cu(OAc) <sub>2</sub> (0.2), Na <sub>2</sub> CO <sub>3</sub> (2.0), TMEDA (20.0)                | Toluene        | 16 h                    | 14/-/77                                 |

<sup>a</sup>Standard condition: **1** (0.3 mmol), toluene (10 mL), O<sub>2</sub> (balloon), 140 °C. <sup>b</sup>Yields of **3a**, **4** and **1** determined by <sup>1</sup>H-NMR. <sup>c</sup>Required reaction time for completely consuming **1**. <sup>d</sup>Isolated yield of **3a**. <sup>e</sup>Abbreviations: pyr. = pyridine, TMEDA = *N,N'*-tetramethylethylenediamine.

### General procedure for the copper-mediated amidation reaction.

To a dry flask, were added the heterocycle, the amide nucleophile, the base and Cu(OAc)<sub>2</sub> respectively. An atmosphere of oxygen was introduced by briefly evacuating the flask, then flushing with pure oxygen (1 atm). Toluene and pyridine were added to the flask. The resulting green mixture was allowed to stir at room temperature for 30 mins and then heat at 120-140 °C for 12-30 h. After the limiting starting material was completely consumed, the reaction mixture was cooled down to room temperature and diluted with EtOAc. The mixture was washed with aqueous ammonium, brine, and dried over Na<sub>2</sub>SO<sub>4</sub>. The dried solution was filtered and the filtrate was concentrated under reduced pressure. The resulting residue was further purified by silica gel chromatography.

### Procedure for the preparation of bezimidazole precursors 9 and 10.

To the colorless solution of Tosyl-Cl (106 mg, 0.56 mmol) in CH<sub>2</sub>Cl<sub>2</sub> (5 ml), was added 2-(1H-benzo[d]imidazol-1-yl)ethanamine hydrochloride or 3-(1H-benzo[d]imidazol-1-yl)propan-1-amine hydrochloride (0.51 mmol) slowly at room temperature. The solution was stirred for 2 h and then diluted with water. The aqueous layer was separated and extracted with EtOAc. The combined organic layers were washed with brine and dried over Na<sub>2</sub>SO<sub>4</sub>. The dried solution was filtered and the filtrate was concentrated under reduced pressure. The resulting residue was further purified by silica gel chromatography.

### Characterizations of new compounds.

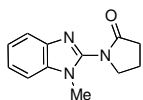

**1-(1-methyl-1H-benzo[d]imidazol-2-yl)pyrrolidin-2-one (3a).** Yield: 82%.  $R_f = 0.25$  (100% ethyl acetate); <sup>1</sup>H NMR (500 MHz, CDCl<sub>3</sub>) δ 7.71-7.64 (m, 1H), 7.35-7.30 (m, 1H), 7.30-7.21 (m, 2H), 4.08 (t,  $J = 7.0$  Hz, 2H), 3.69 (s, 3H), 2.61 (t,  $J = 8.0$  Hz, 2H), 2.27 (tt,  $J = 8.0, 7.0$  Hz, 2H); <sup>13</sup>C NMR (126 MHz, CDCl<sub>3</sub>) δ 175.1, 146.2, 140.7, 134.9, 122.4, 122.2, 118.9, 109.3, 49.2, 31.3, 31.2, 19.1; IR (neat): 2984, 294, 1735, 1516, 1373, 1235, 1043 cm<sup>-1</sup>. HRMS-ESI ( $m/z$ )-ESI  $m/z$  calcd. for C<sub>12</sub>H<sub>13</sub>N<sub>3</sub>ONa [M+Na] 238.0951; Found: 238.0948.

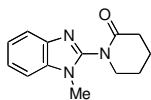

**1-(1-methyl-1H-benzo[d]imidazol-2-yl)piperidin-2-one (3b).** Yield: 55%.  $R_f = 0.20$  (100% ethyl acetate); <sup>1</sup>H NMR (500 MHz, CDCl<sub>3</sub>) δ 7.72 (d,  $J = 7.3$  Hz, 1H), 7.35 (d,  $J = 7.3$  Hz, 1H), 7.33-7.25 (m, 2H), 3.92 (t,  $J = 5.5$  Hz, 2H), 3.62 (s, 3H), 2.64 (t,  $J = 6.3$  Hz, 2H), 2.14-1.94 (m, 4H); <sup>13</sup>C NMR (75 MHz, CDCl<sub>3</sub>) δ 171.0, 149.3, 140.9, 134.7, 122.7, 122.2, 119.5, 109.5, 50.7, 32.9, 30.3, 23.2, 21.2; IR (neat): 3056, 2948, 1668, 1509, 1480, 1442, 1396, 1329, 1285, 1160, 908, 740 cm<sup>-1</sup>, HRMS-ESI ( $m/z$ ) calcd. for C<sub>13</sub>H<sub>15</sub>N<sub>3</sub>ONa [M+Na] 252.1107; Found: 252.1112.

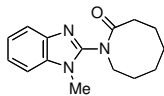

**1-(1-methyl-1H-benzo[d]imidazol-2-yl)azocan-2-one (3c).** Yield: 55%.  $R_f = 0.30$  (100% ethyl acetate); <sup>1</sup>H NMR (500 MHz, CDCl<sub>3</sub>) δ 7.74 (d,  $J = 7.6$  Hz, 1H), 7.37 - 7.25 (m, 3H), 4.01 (t,  $J = 6.0$  Hz, 2H), 3.64 (s, 3H), 2.76 (t,  $J = 5.0$  Hz, 2H), 2.06-1.89 (m, 4H), 1.85-1.70 (m, 4H); <sup>13</sup>C NMR (125 MHz, CDCl<sub>3</sub>) δ 175.9, 149.1, 140.8, 134.7, 122.6, 122.0, 119.6, 109.4, 50.2, 34.1, 30.5, 30.3, 28.5, 26.1, 24.7; IR (neat): 2926, 1664, 1508, 1475, 1439, 1392, 1329, 12383, 1129, 912, 727, 561 cm<sup>-1</sup>. HRMS-ESI ( $m/z$ ) calcd. for C<sub>15</sub>H<sub>20</sub>N<sub>3</sub>O [M+1]: 258.1601; Found: 258.1604.

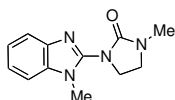

**1-methyl-3-(1-methyl-1H-benzo[d]imidazol-2-yl)imidazolidin-2-one (3d).** Yield: 45%.  $R_f = 0.20$  (100% ethyl acetate); <sup>1</sup>H NMR (500 MHz, CDCl<sub>3</sub>) δ 7.68 (d,  $J = 7.0$  Hz, 1H), 7.35 (d,  $J = 7.0$  Hz, 1H), 7.32-7.27 (m, 2H), 4.16 (t,  $J = 7.6$  Hz, 2H), 3.81 (s, 3H), 3.63 (t,  $J = 7.6$  Hz, 2H), 2.97 (s, 3H); <sup>13</sup>C NMR (125 MHz, CDCl<sub>3</sub>) δ 157.7, 148.0, 140.8, 135.4, 122.0, 121.9, 118.5, 109.2, 44.9, 43.5, 31.5, 31.1; IR (neat): 3051, 1717, 1523, 1482, 1429, 1398, 1278, 1264, 1230, 726 cm<sup>-1</sup>. HRMS-ESI ( $m/z$ ) calcd. for C<sub>12</sub>H<sub>14</sub>N<sub>4</sub>ONa [M+Na]: 253.1060, Found: 253.1066.

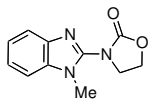

**3-(1-methyl-1H-benzo[d]imidazol-2-yl)oxazolidin-2-one (3e).** Yield: 72%.  $R_f = 0.20$  (100% ethyl acetate);  $^1\text{H}$  NMR (500 MHz,  $\text{CDCl}_3$ )  $\delta$  7.69 (d,  $J = 7.0$  Hz, 1H), 7.36-7.27 (m, 3H), 4.61 (t,  $J = 7.5$  Hz, 2H), 4.34 (t,  $J = 7.5$  Hz, 2H), 3.78 (s, 3H);  $^{13}\text{C}$  NMR (125 MHz,  $\text{CDCl}_3$ )  $\delta$  155.4, 145.2, 140.4, 135.1, 122.7, 122.5, 118.9, 109.4, 63.4, 46.3, 31.2; IR (neat): 2911, 1763, 1524, 1483, 1449, 1401, 1228, 1209, 1133, 1037, 746  $\text{cm}^{-1}$ . HRMS-ESI ( $m/z$ ) calcd. for  $\text{C}_{11}\text{H}_{12}\text{N}_3\text{O}_2$   $[\text{M}+1]$ : 218.0924; Found: 218.0926.

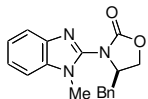

**4-benzyl-3-(1-methyl-1H-benzimidazol-2-yl)-1,3-oxazolidin-2-one (3f).** Yield: 64%.  $R_f = 0.30$  (100% ethyl acetate);  $^1\text{H}$  NMR (500 MHz,  $\text{CDCl}_3$ )  $\delta$  7.90-7.62 (m, 1H), 7.41-7.22 (m, 6H), 7.08 (d,  $J = 7.2$  Hz, 2H), 5.18 (qd,  $J = 8.5, 4.0$  Hz, 1H), 4.55 (t,  $J = 8.5$  Hz, 1H), 4.34 (t,  $J = 8.5$  Hz, 1H), 3.73 (s, 3H), 3.23 (dd,  $J = 13.8, 4.0$  Hz, 1H), 2.95 (dd,  $J = 13.8, 8.5$  Hz, 1H);  $^{13}\text{C}$  NMR (75 MHz,  $\text{CDCl}_3$ )  $\delta$  155.4, 144.4, 140.9, 135.0, 134.5, 129.2, 128.8, 127.3, 122.8, 122.5, 119.3, 109.5, 68.1, 58.0, 37.8, 30.8; IR (neat): 1762, 1709, 1399, 1360, 1220, 729, 702  $\text{cm}^{-1}$ . HRMS-ESI ( $m/z$ ) calcd. for  $\text{C}_{18}\text{H}_{17}\text{N}_3\text{O}_2\text{Na}$   $[\text{M}+\text{Na}]$ : 330.1213, Found: 330.1209.

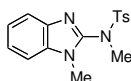

**N,4-dimethyl-N-(1-methyl-1H-benzimidazol-2-yl)benzenesulfonamide (3g).** Yield: 50%.  $R_f = 0.30$  (30% ethyl acetate-hexanes);  $^1\text{H}$  NMR (300 MHz,  $\text{CDCl}_3$ )  $\delta$  7.67 (d,  $J = 7.6$  Hz, 1H), 7.60 (d,  $J = 8.3$  Hz, 2H), 7.43 - 7.38 (m, 1H), 7.36 (dd,  $J = 6.9, 1.2$  Hz, 1H), 7.34 - 7.25 (m, 3H), 3.91 (s, 3H), 3.20 (s, 3H), 2.44 (s, 3H);  $^{13}\text{C}$  NMR (75 MHz,  $\text{CDCl}_3$ )  $\delta$  147.7, 144.8, 140.3, 134.7, 132.1, 129.7, 128.8, 123.4, 122.6, 119.6, 110.0, 38.1, 30.8, 21.6; IR (neat): 3055, 1394, 1352, 1160, 779, 700  $\text{cm}^{-1}$ . HRMS-ESI ( $m/z$ ) calcd. for  $\text{C}_{16}\text{H}_{17}\text{N}_3\text{O}_2\text{SNa}$   $[\text{M}+\text{Na}]$ : 338.0934, Found: 338.0928.

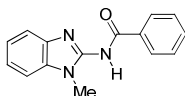

**N-(1-methyl-1H-benzimidazol-2-yl)benzamide (3h).** Yield: 85%.  $R_f = 0.30$  (30% ethyl acetate-hexanes);  $^1\text{H}$  NMR (300 MHz,  $\text{CDCl}_3$ )  $\delta$  8.36 (d,  $J = 6.9$  Hz, 2H), 7.60 - 7.41 (m, 3H), 7.40 - 7.21 (m, 4H), 3.82 (s, 3H);  $^{13}\text{C}$  NMR (125 MHz,  $\text{CDCl}_3$ )  $\delta$  176.3, 153.9, 137.9, 131.2, 130.2, 129.2, 128.3, 127.9, 123.0 (2), 111.2, 108.9, 28.2. HRMS calcd for  $\text{C}_{15}\text{H}_{14}\text{N}_3\text{O}$   $[\text{M}+\text{H}]$ : 252.1131, Found: 252.1136.

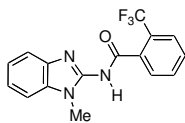

**N-(1-methyl-1H-benzo[d]imidazol-2-yl)-2-(trifluoromethyl)benzamide (3i).** Yield: 91%.  $R_f = 0.30$  (20% ethyl acetate-hexanes);  $^1\text{H}$  NMR (500 MHz,  $\text{D}_2\text{O}$ )  $\delta$  12.27 (brs, 1H), 7.93 (d,  $J = 7.6$  Hz, 1H), 7.73 (d,  $J = 7.6$  Hz, 1H), 7.58 (t,  $J = 7.6$  Hz, 1H), 7.49 (t,  $J = 7.6$  Hz, 1H), 7.32-7.22 (m, 4H), 3.69 (s, 3H).  $^{13}\text{C}$  NMR (75 MHz,  $\text{CDCl}_3$ )  $\delta$  177.9, 153.5, 139.8, 131.4, 130.0, 129.9, 129.0, 128.0, 127.8 (q,  $J = 31.5$  Hz), 126.4 (q,  $J = 5.5$  Hz), 124.2 (q,  $J = 274.5$  Hz), 123.4, 123.3, 111.3, 109.2, 28.3; IR (neat): 3274, 1736, 1571, 1484, 1383, 1365, 1315, 1135  $\text{cm}^{-1}$ . HRMS-ESI ( $m/z$ ) calcd. for  $\text{C}_{16}\text{H}_{12}\text{F}_3\text{N}_3\text{ONa}$   $[\text{M}+\text{Na}]$ : 342.0825; Found: 342.0825.

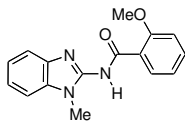

**2-methoxy-N-(1-methyl-1H-benzo[d]imidazol-2-yl)benzamide (3j).** Yield: 72%.  $R_f = 0.30$  (20% ethyl acetate-hexanes);  $^1\text{H}$  NMR (300 MHz,  $\text{CDCl}_3$ )  $\delta$  12.45 (brs, 0.5H), 10.15 (brs, 0.5H), 8.18 (d,  $J = 6.6$  Hz, 1H), 7.50 (t,  $J = 7.2$  Hz, 2H), 7.36-7.18 (m, 3H), 7.17-6.86 (m, 2H), 4.02 (s, 3H), 3.75 (s, 3H).  $^{13}\text{C}$  NMR (125 MHz,  $\text{CD}_3\text{OD}$ )  $\delta$

1169.4, 159.5, 147.4, 136.8, 135.3, 134.2, 132.6, 124.8, 124.6, 123.4, 122.2, 117.2, 113.3, 111.3, 56.9, 30.4; IR (neat): 3298, 1602, 1571, 1483, 1375, 1244, 747  $\text{cm}^{-1}$ . HRMS–ESI ( $m/z$ ) calcd. for  $\text{C}_{16}\text{H}_{15}\text{N}_3\text{O}_2\text{Na}$  [M+Na]: 304.1057; Found: 304.1054.

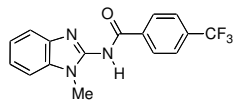

***N*-(1-methyl-1*H*-benzo[*d*]imidazol-2-yl)-4-(trifluoromethyl)benzamide (3k).** Yield: 70%.  $R_f = 0.30$  (20% ethyl acetate-hexanes);  $^1\text{H}$  NMR (300 MHz,  $\text{CDCl}_3$ )  $\delta$  12.28 (s, 1H), 8.46 (d,  $J = 8.1$  Hz, 2H), 7.71 (d,  $J = 8.1$  Hz, 2H), 7.41 – 7.22 (m, 4H), 3.81 (s, 3H);  $^{13}\text{C}$  NMR (125 MHz, DMSO)  $\delta$  171.8, 152.3, 141.8, 130.6 (q,  $J = 32.0$  Hz), 129.8, 129.1, 128.5, 124.6 (q,  $J = 3.0$  Hz), 124.0 (q,  $J = 272.5$  Hz), 122.5 (2C), 111.8, 109.3, 28.1; IR (neat): 3278, 1578, 1560, 1321, 1104, 1064, 746  $\text{cm}^{-1}$ . HRMS–ESI ( $m/z$ ) calcd. for  $\text{C}_{16}\text{H}_{13}\text{F}_3\text{N}_3\text{O}$  [M+1] 320.1005; Found: 320.1045.

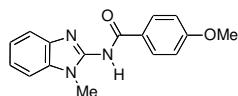

**4-methoxy-*N*-(1-methyl-1*H*-benzimidazol-2-yl)benzamide (3l).** Yield: 67%.  $R_f = 0.30$  (20% ethyl acetate-hexanes);  $^1\text{H}$  NMR (300 MHz,  $\text{CDCl}_3$ )  $\delta$  8.33 (d,  $J = 8.6$  Hz, 2H), 7.44 – 7.15 (m, 4H), 6.96 (d,  $J = 8.6$  Hz, 2H), 3.89 (s, 3H), 3.79 (s, 3H).  $^{13}\text{C}$  NMR (75 MHz,  $\text{CDCl}_3$ )  $\delta$  176.3, 162.3, 154.2, 131.1, 130.8, 130.3, 128.3, 123.0, 114.1, 113.2, 111.0, 108.9, 55.3, 28.2; IR (neat): 1572, 1321, 1251, 689, 668  $\text{cm}^{-1}$ . HRMS–ESI ( $m/z$ ) calcd. for  $\text{C}_{16}\text{H}_{15}\text{N}_3\text{O}_2\text{Na}$  [M+Na]: 304.1057; Found: 304.1054.

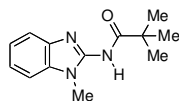

***N*-(1-methyl-1*H*-benzo[*d*]imidazol-2-yl)pivalamide (3m).** Yield: 58%.  $R_f = 0.30$  (20% ethyl acetate-hexanes);  $^1\text{H}$  NMR (500 MHz,  $\text{CDCl}_3$ )  $\delta$  12.16 (brs, 1H), 7.25-7.17 (m, 4H), 3.63 (s, 3H), 1.29 (s, 9H).  $^{13}\text{C}$  NMR (125 MHz,  $\text{CDCl}_3$ )  $\delta$  173.6, 154.0, 130.7, 129.1, 122.8, 122.6, 111.2, 108.8, 41.1, 28.2, 28.1; IR (neat): 3253, 2952, 1593, 1548, 1477, 1391, 739  $\text{cm}^{-1}$ . HRMS–ESI ( $m/z$ ) calcd. for  $\text{C}_{13}\text{H}_{18}\text{N}_3\text{O}$  [M+H]: 232.1444; Found: 232.1455.

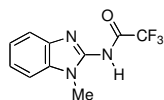

**2,2,2-trifluoro-*N*-(1-methyl-1*H*-benzo[*d*]imidazol-2-yl)acetamide (3n).** Yield: 68%.  $R_f = 0.30$  (20% ethyl acetate-hexanes);  $^1\text{H}$  NMR (500 MHz,  $\text{CDCl}_3$ )  $\delta$  11.97 (brs, 1H), 7.48 (d,  $J = 6.6$  Hz, 2H), 7.41-7.32 (m, 3H), 3.76 (s, 3H);  $^{13}\text{C}$  NMR (125 MHz,  $\text{CDCl}_3$ )  $\delta$  166.8 – 165.8 (m), 153.1, 129.8, 127.8, 124.3, 124.2, 117.2 (q,  $J = 286.0$  Hz), 112.1, 109.8, 28.7; IR (neat): 3230, 2922, 1549, 1481, 1124, 741  $\text{cm}^{-1}$ . HRMS–ESI ( $m/z$ ) calcd. for  $\text{C}_{10}\text{H}_9\text{F}_3\text{N}_3\text{O}$  [M+1]: 244.0692; Found: 244.0696.

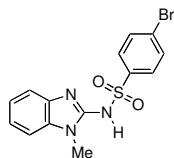

**4-bromo-*N*-(1-methyl-1*H*-benzo[*d*]imidazol-2-yl)benzenesulfonamide (3o).** Yield: 97%.  $R_f = 0.30$  (20% ethyl acetate-hexanes);  $^1\text{H}$  NMR (500 MHz,  $\text{CDCl}_3$ )  $\delta$  10.62 (brs, 1H), 7.87 (d,  $J = 8.6$  Hz, 2H), 7.56 (d,  $J = 8.6$  Hz, 2H), 7.35-7.31 (m, 1H), 7.24-7.18 (m, 2H), 7.13 (d,  $J = 7.0$  Hz, 1H), 3.52 (s, 3H);  $^{13}\text{C}$  NMR (75 MHz,  $\text{CDCl}_3$ )  $\delta$  149.7, 142.7, 131.9, 130.3, 128.2, 127.6, 126.4, 123.5, 123.2, 111.1, 108.9, 28.4; IR (neat): 3357, 3091, 1578, 1483, 1271, 1129, 1084, 1001, 821, 735, 637  $\text{cm}^{-1}$ . HRMS–ESI ( $m/z$ ) calcd. for  $\text{C}_{14}\text{H}_{13}\text{BrN}_3\text{O}_2\text{S}$  [M+1]: 365.9906; Found: 365.9915.

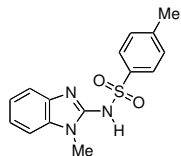

**4-methyl-N-(1-methyl-1H-benzo[d]imidazol-2-yl)benzenesulfonamide (3p).** Yield: 86%.  $R_f = 0.30$  (20% ethyl acetate-hexanes);  $^1\text{H NMR}$  (300 MHz,  $\text{CDCl}_3$ )  $\delta$  10.69 (brs, 1H), 7.90 (d,  $J = 8.0$  Hz, 2H), 7.36-7.29 (m, 1H), 7.23 (d,  $J = 8.0$  Hz, 2H), 7.21-7.15 (m, 2H), 7.13-7.07 (m, 1H), 3.50 (s, 3H), 2.37 (s, 3H).  $^{13}\text{C NMR}$  (75 MHz,  $\text{CDCl}_3$ )  $\delta$  149.8, 142.2, 140.8, 130.3, 129.3, 128.3, 126.0, 123.2, 122.9, 111.1, 108.7, 28.3, 21.4; IR (neat): 3312, 2925, 1711, 1585, 1275, 1132, 1084, 829, 746, 673, 533  $\text{cm}^{-1}$ . HRMS-ESI ( $m/z$ ) calcd. for  $\text{C}_{15}\text{H}_{16}\text{N}_3\text{O}_2\text{S}$  [ $\text{M}+1$ ]: 302.0956; Found: 302.0964.

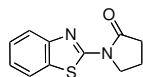

**1-(benzo[d]thiazol-2-yl)pyrrolidin-2-one (5a).** Yield: 45%.  $R_f = 0.50$  (50% ethyl acetate-hexanes);  $^1\text{H NMR}$  (300 MHz,  $\text{CDCl}_3$ )  $\delta$  7.79-7.86 (t,  $J = 7.7$  Hz, 2H), 7.43 (td,  $J = 7.7, 1.3$  Hz, 1H), 7.31 (td,  $J = 7.7, 1.3$  Hz, 1H), 4.27 (t,  $J = 7.2$  Hz, 2H), 2.74 (t,  $J = 8.0$  Hz, 2H), 2.29 (tt,  $J = 8.0, 7.2$  Hz, 2H);  $^{13}\text{C NMR}$  (75 MHz,  $\text{CDCl}_3$ )  $\delta$  174.2, 157.1, 148.7, 132.4, 126.0, 123.9, 121.3 (2C), 48.2, 31.9, 18.1; IR (neat): 3034, 1709, 1510, 1360, 1221, 917, 730, 529  $\text{cm}^{-1}$ . HRMS-ESI ( $m/z$ ) calcd. for  $\text{C}_{11}\text{H}_{10}\text{N}_2\text{OSNa}$  [ $\text{M}+\text{Na}$ ]: 241.0406; Found: 241.0398.

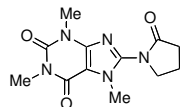

**1,3,7-trimethyl-8-(2-oxopyrrolidin-1-yl)-1H-purine-2,6(3H,7H)-dione (6a).** Yield: 42%.  $R_f = 0.20$  (100% ethyl acetate);  $^1\text{H NMR}$  (300 MHz,  $\text{CDCl}_3$ )  $\delta$  3.97 (t,  $J = 7.0$  Hz, 2H), 3.86 (s, 3H), 3.52 (s, 3H), 3.40 (s, 3H), 2.61 (t,  $J = 8.1$  Hz, 2H), 2.29 (tt,  $J = 8.1, 7.0$  Hz, 2H);  $^{13}\text{C NMR}$  (75 MHz,  $\text{CDCl}_3$ )  $\delta$  174.8, 155.1, 151.6, 146.7, 144.3, 106.5, 49.0, 33.2, 31.0, 29.7, 27.9, 19.1; IR (neat): 1701, 1661, 1512, 1452, 1216  $\text{cm}^{-1}$ . HRMS-ESI ( $m/z$ ) calcd. for  $\text{C}_{12}\text{H}_{16}\text{N}_5\text{O}_3$  [ $\text{M}+1$ ]: 278.1248. Found: 278.1253.

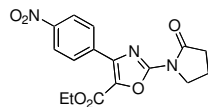

**Ethyl 4-(4-nitrophenyl)-2-(2-oxopyrrolidin-1-yl)-1,3-oxazole-5-carboxylate (7a).** Yield: 84%.  $R_f = 0.20$  (100% ethyl acetate);  $^1\text{H NMR}$  (500 MHz,  $\text{CDCl}_3$ )  $\delta$  8.31 (d,  $J = 9.0$  Hz, 2H), 8.26 (d,  $J = 9.0$  Hz, 2H), 4.43 (q,  $J = 7.1$  Hz, 2H), 4.10 (t,  $J = 7.2$  Hz, 2H), 2.65 (t,  $J = 8.1$  Hz, 2H), 2.25 (tt,  $J = 8.1, 7.2$  Hz, 2H), 1.40 (t,  $J = 7.1$  Hz, 3H);  $^{13}\text{C NMR}$  (126 MHz,  $\text{CDCl}_3$ )  $\delta$  172.7, 161.6, 152.5, 149.0, 147.8, 132.4, 128.7, 128.5, 123.6, 61.9, 47.5, 31.9, 18.3, 14.2; IR (neat): 2984, 1737, 1585, 1344, 1188, 1082, 856, 728  $\text{cm}^{-1}$ . HRMS-ESI ( $m/z$ ) calcd. for  $\text{C}_{16}\text{H}_{15}\text{N}_3\text{O}_6\text{Na}$  [ $\text{M}+\text{Na}$ ]: 268.0853; Found: 368.0858.

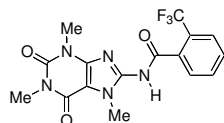

**2-(trifluoromethyl)-N-(1,3,7-trimethyl-2,6-dioxo-2,3,6,7-tetrahydro-1H-purin-8-yl)benzamide (6i).** Yield: 63%.  $R_f = 0.20$  (100% ethyl acetate);  $^1\text{H NMR}$  (500 MHz,  $\text{CDCl}_3$ )  $\delta$  8.43 (brs, 1H), 7.85-7.80 (m, 1H), 7.77-7.65 (m, 3H), 3.97 (s, 3H), 3.43 (s, 3H), 3.40 (s, 3H);  $^{13}\text{C NMR}$  (125 MHz,  $\text{DMSO-d}_6$ )  $\delta$  167.5, 155.1, 151.7, 147.0, 144.1, 135.0, 133.2, 131.4, 129.5, 127.2 (q,  $J = 4.5$  Hz), 126.9 (q,  $J = 31.0$  Hz), 124.4 (q,  $J = 273.5$  Hz), 106.3, 32.5, 30.1, 28.2; IR (neat): 3196, 2925, 1709, 1651, 1505, 1315, 1172, 1131, 1036, 736  $\text{cm}^{-1}$ . HRMS-ESI ( $m/z$ ) calcd. for  $\text{C}_{16}\text{H}_{14}\text{F}_3\text{N}_5\text{O}_3\text{Na}$  [ $\text{M}+\text{Na}$ ]: 404.0941; Found: 404.0947.

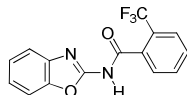

***N*-(1,3-benzoxazol-2-yl)-2-(trifluoromethyl)benzamide (8i)**. Yield: 76%.  $R_f = 0.20$  (100% ethyl acetate);  $^1\text{H NMR}$  (300 MHz,  $\text{CDCl}_3$ )  $\delta$  11.81 (brs, 1H), 7.91 – 7.69 (m, 2H), 7.67 – 7.53 (m, 2H), 7.49 (d,  $J = 7.6$  Hz, 1H), 7.26 (td,  $J = 7.6, 1.2$  Hz, 1H), 7.18 (t,  $J = 7.6$  Hz, 1H), 6.75 (brs, 1H).  $^{13}\text{C NMR}$  (125 MHz, DMSO)  $\delta$  166.4, 155.9, 148.4, 140.9, 135.6, 133.6, 131.8, 129.7, 127.5 (q,  $J = 5.0$  Hz), 127.0 (q,  $J = 31.5$  Hz), 125.8, 125.0, 124.7 (q,  $J = 271.5$  Hz), 119.2, 111.2; IR (neat): 2927, 1628, 1578, 1552, 1314, 1132, 1109, 743  $\text{cm}^{-1}$ , HRMS–ESI ( $m/z$ ) calcd. for  $\text{C}_{15}\text{H}_9\text{F}_3\text{N}_2\text{O}_2\text{Na}$  [M+Na]: 329.0508; Found: 329.0527.

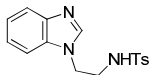

***N*-[2-(1*H*-benzimidazol-1-yl)ethyl]-4-methylbenzenesulfonamide (9)**. Yield: 59%.  $R_f = 0.20$  (100% ethyl acetate);  $^1\text{H NMR}$  (500 MHz,  $\text{CDCl}_3$ )  $\delta$  7.82 (s, 1H), 7.76 (s, 1H), 7.73 (d,  $J = 8.2$  Hz, 2H), 7.28 (d,  $J = 8.1$  Hz, 1H), 7.24 (d,  $J = 8.2$  Hz, 2H), 7.19 (d,  $J = 8.1$  Hz, 1H), 7.15 (t,  $J = 7.6$  Hz, 1H), 6.99 (t,  $J = 7.6$  Hz, 1H), 4.30 (t,  $J = 4.9$  Hz, 2H), 3.39 (t,  $J = 4.9$  Hz, 2H), 2.39 (s, 3H).  $^{13}\text{C NMR}$  (125 MHz,  $\text{CDCl}_3$ )  $\delta$  143.3, 143.2, 142.5, 137.3, 132.8, 129.7, 126.8, 123.0, 122.3, 119.3, 109.3, 45.7, 42.1, 21.5. IR (neat): 3093, 1498, 1327, 1157, 1093, 744  $\text{cm}^{-1}$ , HRMS–ESI ( $m/z$ ) calcd. for  $\text{C}_{16}\text{H}_{17}\text{N}_3\text{O}_2\text{SNa}$  [M+Na]: 338.0934; Found: 338.0930.

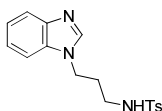

***N*-[3-(1*H*-benzimidazol-1-yl)propyl]-4-methylbenzenesulfonamide (10)**. Yield: 59%.  $R_f = 0.20$  (100% ethyl acetate);  $^1\text{H NMR}$  (500 MHz,  $\text{CDCl}_3$ )  $\delta$  7.90 (s, 1H), 7.84 – 7.73 (m, 1H), 7.70 (d,  $J = 8.2$  Hz, 2H), 7.38 – 7.32 (m, 1H), 7.30 – 7.17 (m, 4H), 6.84 (t,  $J = 5.9$  Hz, 1H), 4.31 (t,  $J = 6.6$  Hz, 2H), 2.88 (q,  $J = 5.9$  Hz, 2H), 2.38 (s, 3H), 2.10 – 2.04 (m, 2H).  $^{13}\text{C NMR}$  (125 MHz,  $\text{CDCl}_3$ )  $\delta$  143.4, 143.4, 136.5, 133.3, 129.7, 126.9, 123.0, 122.3, 120.1, 109.7, 41.7, 39.6, 29.2, 21.4. IR (neat): 3056, 1501, 1318, 1153, 748, 551  $\text{cm}^{-1}$ , HRMS–ESI ( $m/z$ ) calcd. for  $\text{C}_{17}\text{H}_{19}\text{N}_3\text{O}_2\text{SNa}$  [M+Na]: 352.1090; Found: 352.1097.

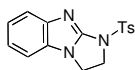

**1-[(4-methylphenyl)sulfonyl]-2,3-dihydro-1*H*-imidazo[1,2-*a*]benzimidazole (11)**. Yield: 86%.  $R_f = 0.50$  (100% ethyl acetate);  $^1\text{H NMR}$  (500 MHz,  $\text{CDCl}_3$ )  $\delta$  7.99 (d,  $J = 8.2$  Hz, 2H), 7.68 (d,  $J = 8.0$  Hz, 1H), 7.28 (d,  $J = 8.2$  Hz, 2H), 7.18 (t,  $J = 7.5$  Hz, 1H), 7.14 – 7.06 (m, 2H), 4.36 (t,  $J = 7.6$  Hz, 2H), 4.10 (t,  $J = 7.6$  Hz, 2H), 2.37 (s, 3H);  $^{13}\text{C NMR}$  (125 MHz,  $\text{CDCl}_3$ )  $\delta$  152.9, 147.5, 145.2, 133.2, 131.4, 129.9, 128.0, 122.1, 121.7, 119.6, 108.4, 51.6, 39.8, 21.6. IR (neat): 1544, 1434, 1277, 1170, 1089, 572  $\text{cm}^{-1}$ , HRMS–ESI ( $m/z$ ) calcd. for  $\text{C}_{16}\text{H}_{15}\text{N}_3\text{O}_2\text{SNa}$  [M+Na]: 336.0777; Found: 336.0775.

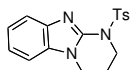

**1-[(4-methylphenyl)sulfonyl]-1,2,3,4-tetrahydropyrimido[1,2-*a*]benzimidazole (12)**. Yield: 90%.  $R_f = 0.50$  (100% ethyl acetate);  $^1\text{H NMR}$  (300 MHz,  $\text{CDCl}_3$ )  $\delta$  8.08 (d,  $J = 8.3$  Hz, 2H), 7.67 (d,  $J = 8.0$  Hz, 1H), 7.26 (d,  $J = 8.3$  Hz, 2H), 7.22 – 7.05 (m, 3H), 4.04 (t,  $J = 5.5$  Hz, 2H), 3.98 (t,  $J = 6.2$  Hz, 2H), 2.37 (s, 3H), 2.30 (tt,  $J = 6.2, 5.5$  Hz, 3H);  $^{13}\text{C NMR}$  (125 MHz,  $\text{CDCl}_3$ )  $\delta$  144.9, 144.5, 141.1, 135.3, 133.1, 129.4, 128.5, 122.2, 121.1, 118.9, 107.8, 44.7, 40.7, 21.9, 21.6. IR (neat): 1525, 1436, 1286, 1150, 671  $\text{cm}^{-1}$ , HRMS–ESI ( $m/z$ ) calcd. for  $\text{C}_{17}\text{H}_{18}\text{N}_3\text{O}_2\text{S}$  [M+1]: 328.1114; Found: 328.1120.

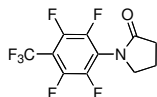

**1-[2,3,5,6-tetrafluoro-4-(trifluoromethyl)phenyl]pyrrolidin-2-one (13a)**. Yield: 22%.  $R_f = 0.40$  (100% ethyl acetate);  $^1\text{H NMR}$  (500 MHz,  $\text{CDCl}_3$ )  $\delta$  3.84 (t,  $J = 7.0$  Hz, 2H), 2.62 (t,  $J = 8.0$  Hz, 2H), 2.35 (tt,  $J = 8.0, 7.0$  Hz, 2H).  $^{19}\text{F NMR}$  (282 MHz,  $\text{CDCl}_3$ )  $\delta$  -56.24 (t,  $J = 21.8$  Hz, 3F), -139.62 – -140.63 (m, 2F), -141.26 – -142.13 (m, 2F).  $^{13}\text{C NMR}$  (125 MHz,  $\text{CDCl}_3$ )  $\delta$  174.2, 146.6, 145.7 – 144.4 (m), 143.6 – 142.4, 121.8, 94.7, 48.9 (t,  $J = 2.1$  Hz), 30.0, 19.6. IR (neat): 1728, 1503, 1346, 1272, 1145, 987, 715  $\text{cm}^{-1}$ , HRMS–ESI ( $m/z$ ) calcd. for  $\text{C}_{11}\text{H}_7\text{NF}_7\text{NO}$  [M+1]: 302.0410; Found: 302.0423.

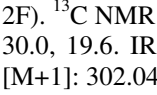

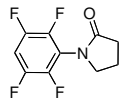

**1-(2,3,5,6-tetrafluorophenyl)pyrrolidin-2-one (14a).** Yield: 33%.  $R_f = 0.50$  (100% ethyl acetate);  $^1\text{H NMR}$  (500 MHz,  $\text{CDCl}_3$ )  $\delta$  7.06 (tt,  $J = 9.7, 7.2$  Hz, 1H), 3.80 (t,  $J = 7.0$  Hz, 2H), 2.59 (t,  $J = 8.1$  Hz, 2H), 2.31 (tt,  $J = 8.1, 7.0$  Hz, 2H);  $^{19}\text{F NMR}$  (282 MHz,  $\text{CDCl}_3$ )  $\delta$  -138.42 – -138.67 (m, 2F), -144.14 – -144.85 (m, 2F).  $^{13}\text{C NMR}$  (125 MHz,  $\text{CDCl}_3$ )  $\delta$  174.5, 146.07 (dddd,  $J = 248.7, 13.0, 11.5, 4.1$  Hz), 144.54 – 141.90 (ddt,  $J = 248.7, 14.4, 3.6$  Hz), 118.45 (tt,  $J = 14.4, 2.7$  Hz), 105.03 (t,  $J = 22.8$  Hz), 49.08 (t,  $J = 1.8$  Hz), 30.1, 19.4. IR (neat): 3046, 1698, 1514, 1495, 1251, 945  $\text{cm}^{-1}$ , HRMS–ESI ( $m/z$ ) calcd. for  $\text{C}_{11}\text{H}_7\text{NF}_7\text{NO}$  [ $\text{M}+1$ ]: 302.0410; Found: 302.0423.

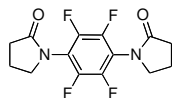

**1,1'-(2,3,5,6-tetrafluorobenzene-1,4-diyl)dipyrrolidin-2-one (14aa).** Yield: 71%.  $R_f = 0.20$  (100% ethyl acetate);  $^1\text{H NMR}$  (500 MHz,  $\text{CDCl}_3$ )  $\delta$  3.78 (t,  $J = 7.0$  Hz, 4H), 2.59 (t,  $J = 8.1$  Hz, 4H), 2.31 (tt,  $J = 8.1, 7.0$  Hz, 4H);  $^{19}\text{F NMR}$  (282 MHz,  $\text{CDCl}_3$ )  $\delta$  -144.42 (s, 4F);  $^{13}\text{C NMR}$  (75 MHz,  $\text{CDCl}_3$ )  $\delta$  174.7, 145.6 – 141.9 (m), 117.4 – 117.0 (m), 49.1, 30.0, 19.4. IR (neat): 1705, 1502, 1395, 1251, 977  $\text{cm}^{-1}$ , HRMS–ESI ( $m/z$ ) calcd. for  $\text{C}_{14}\text{H}_{12}\text{F}_4\text{N}_2\text{O}_2\text{Na}$  [ $\text{M}+\text{Na}$ ]: 339.0727; Found: 339.0734.



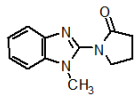

3a

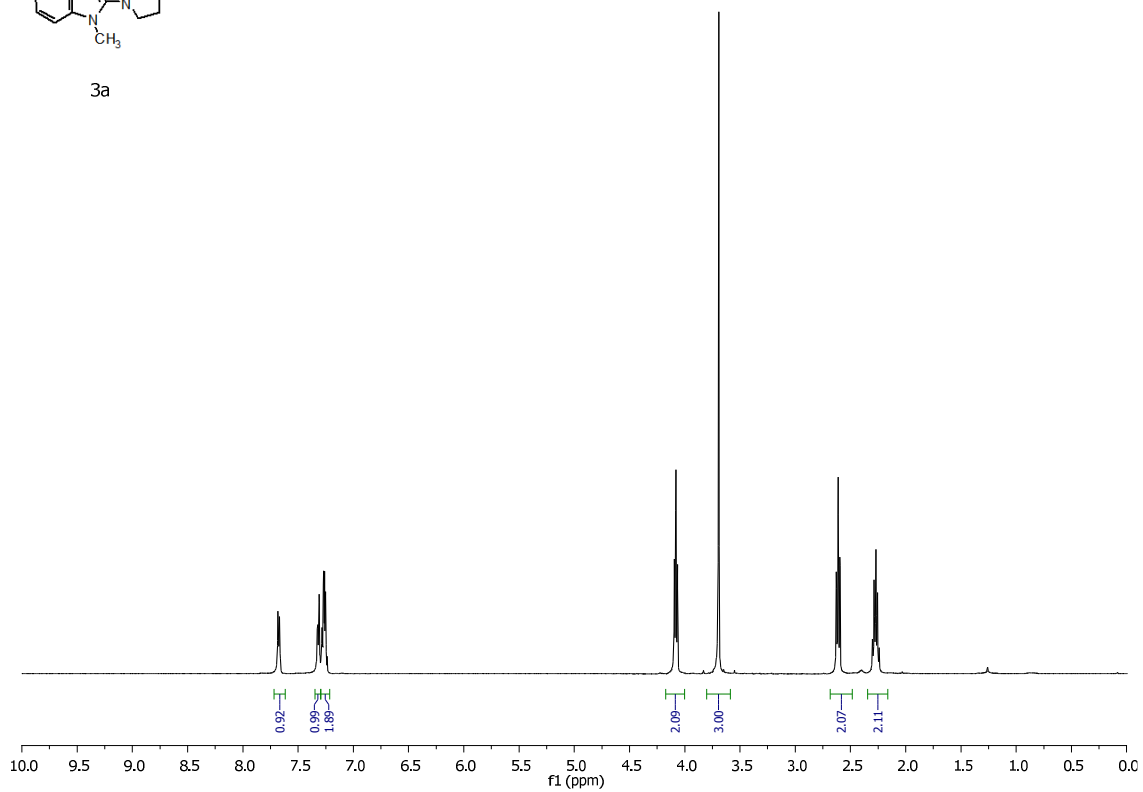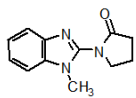

3a

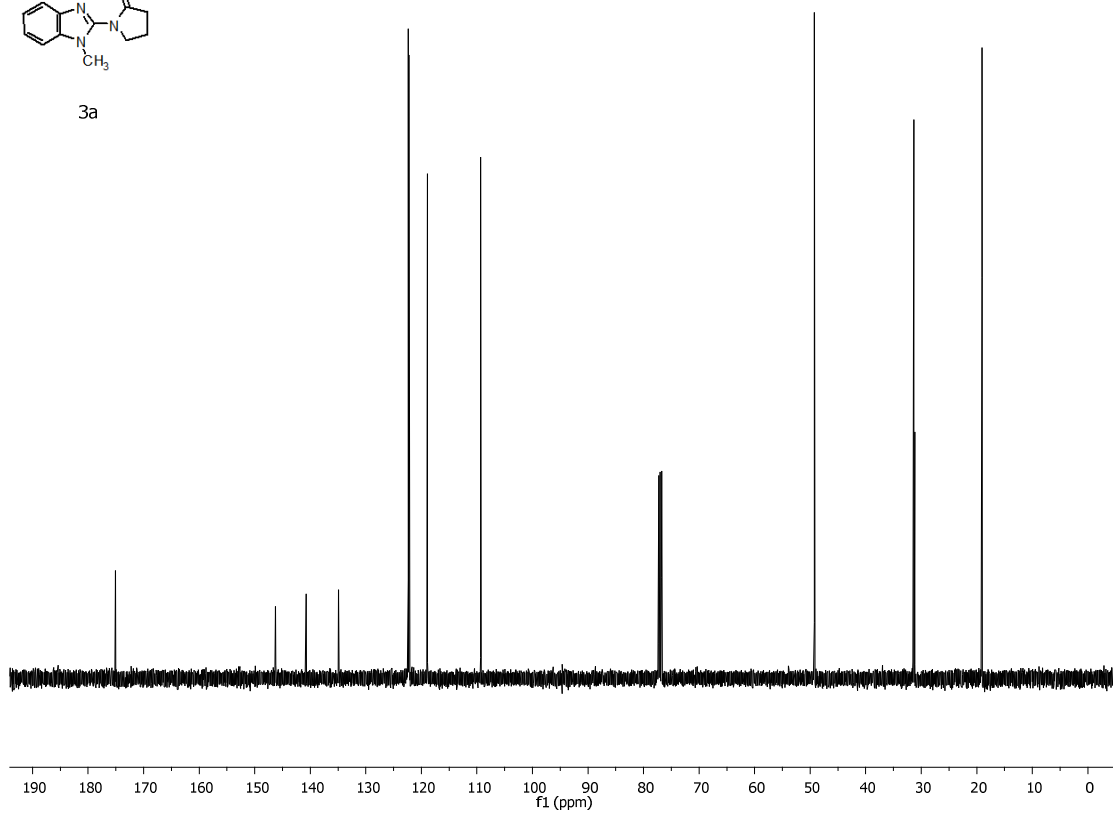

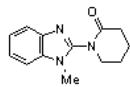

3b

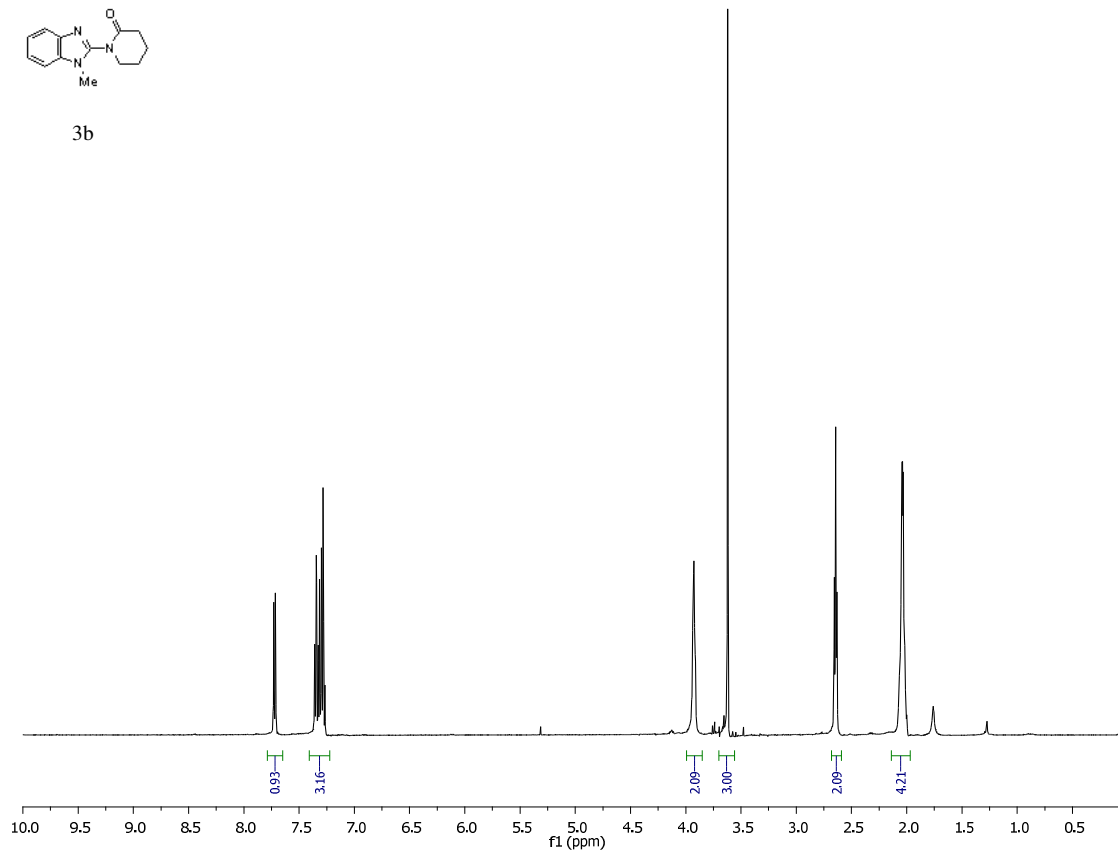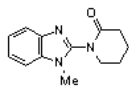

3b

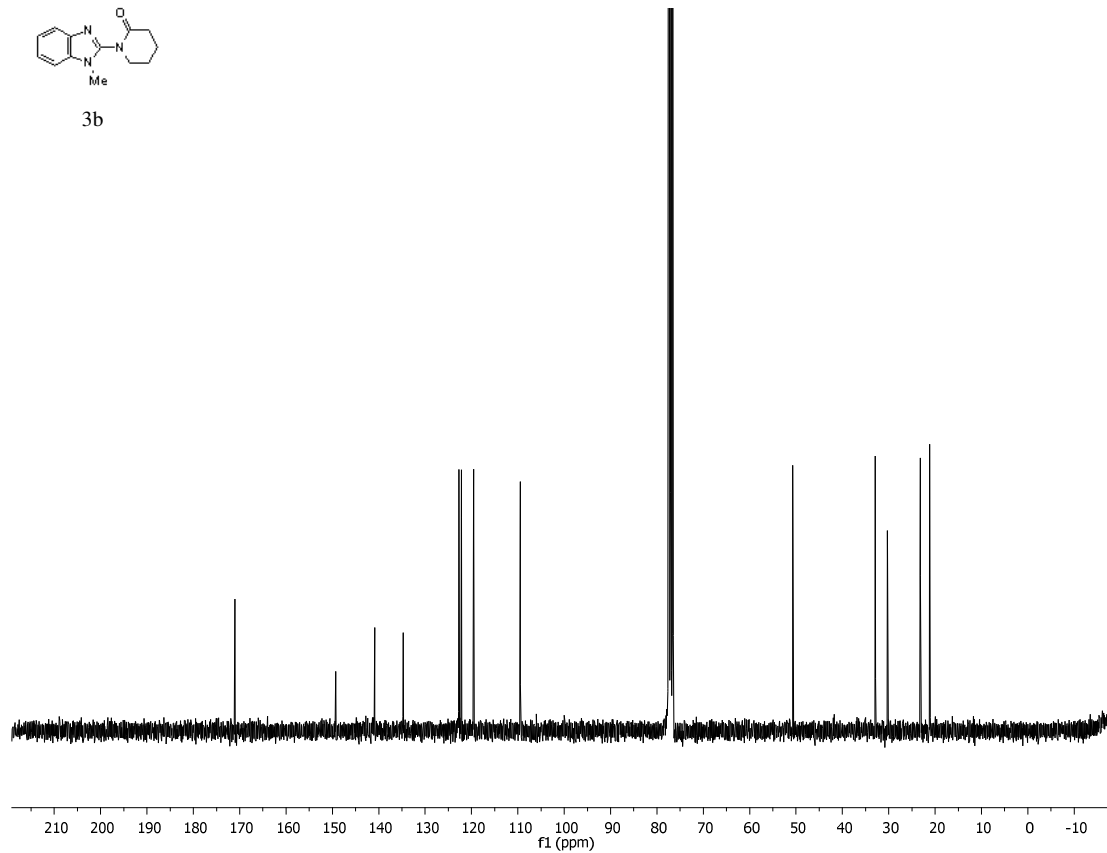

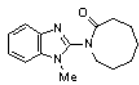

3c

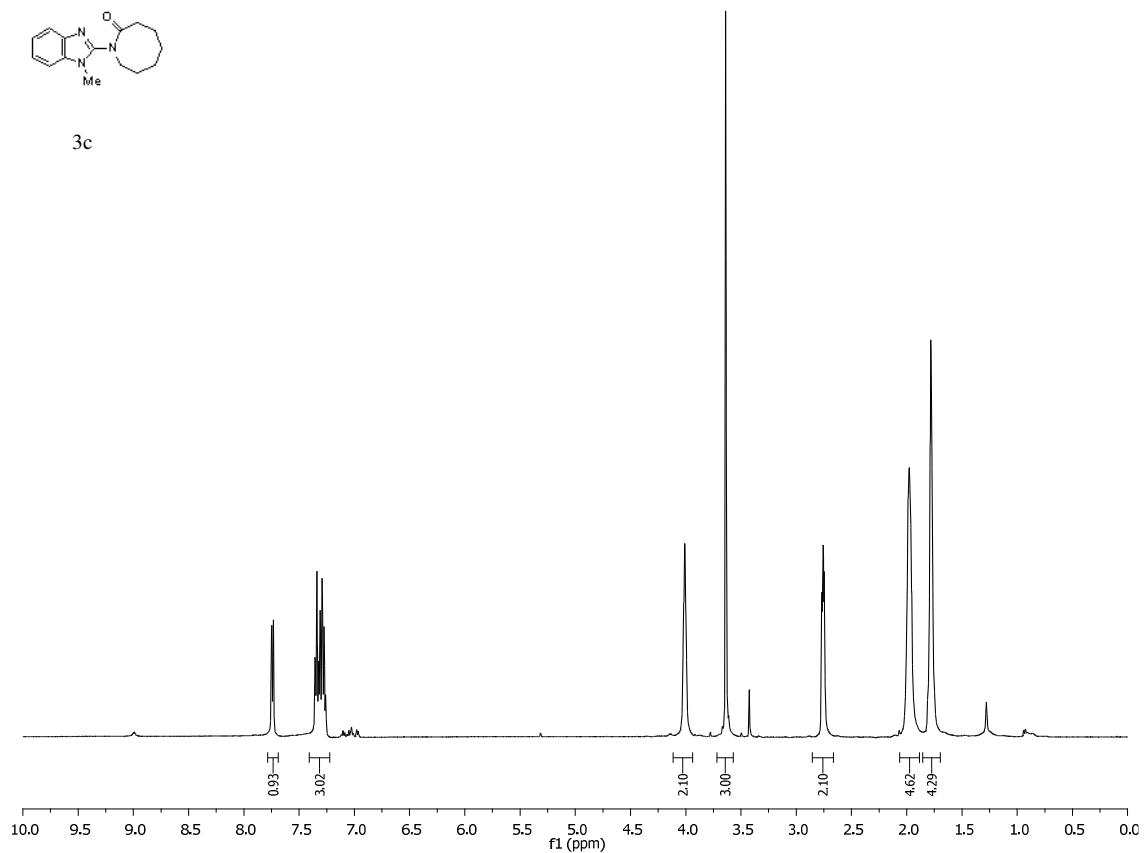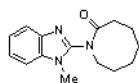

3c

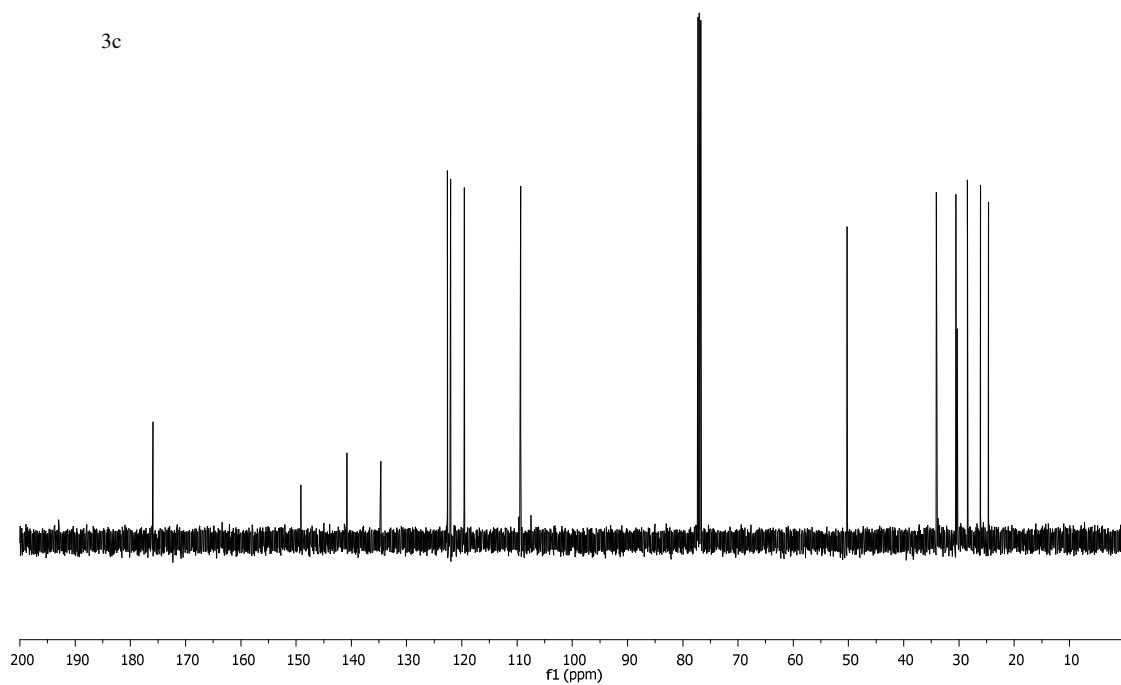

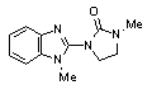

3d

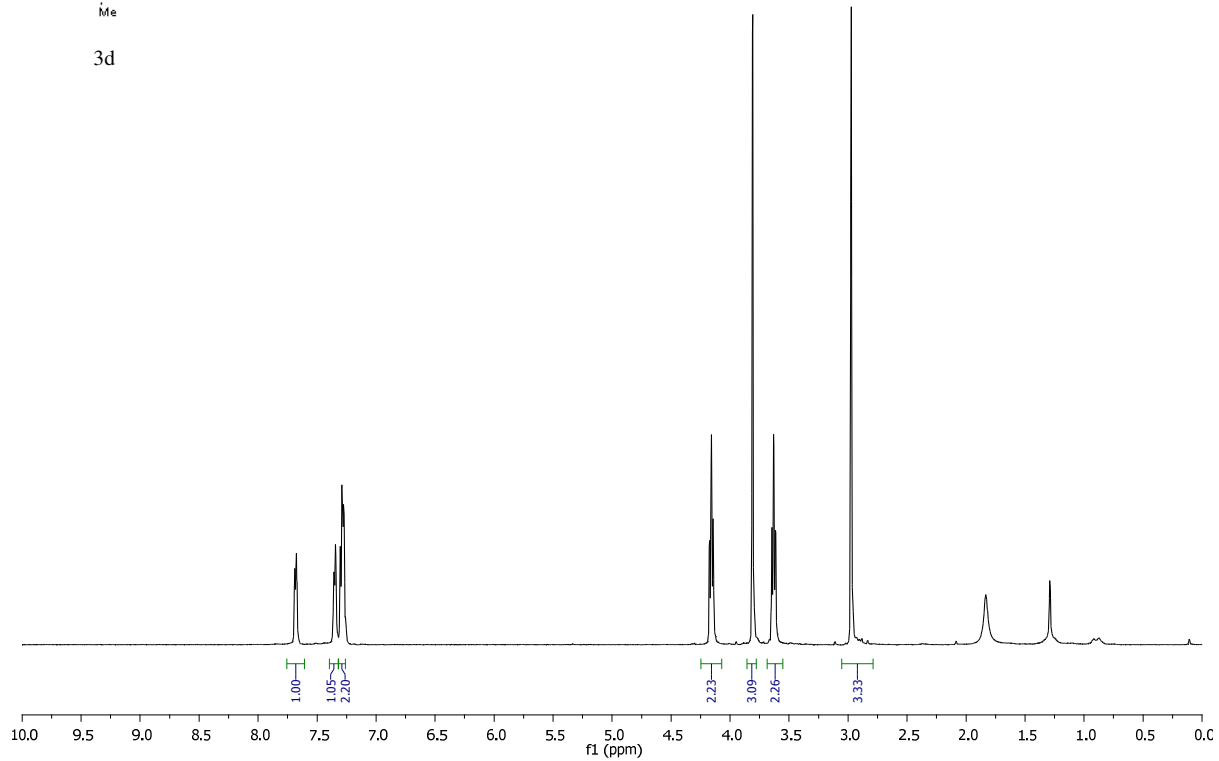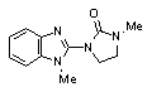

3d

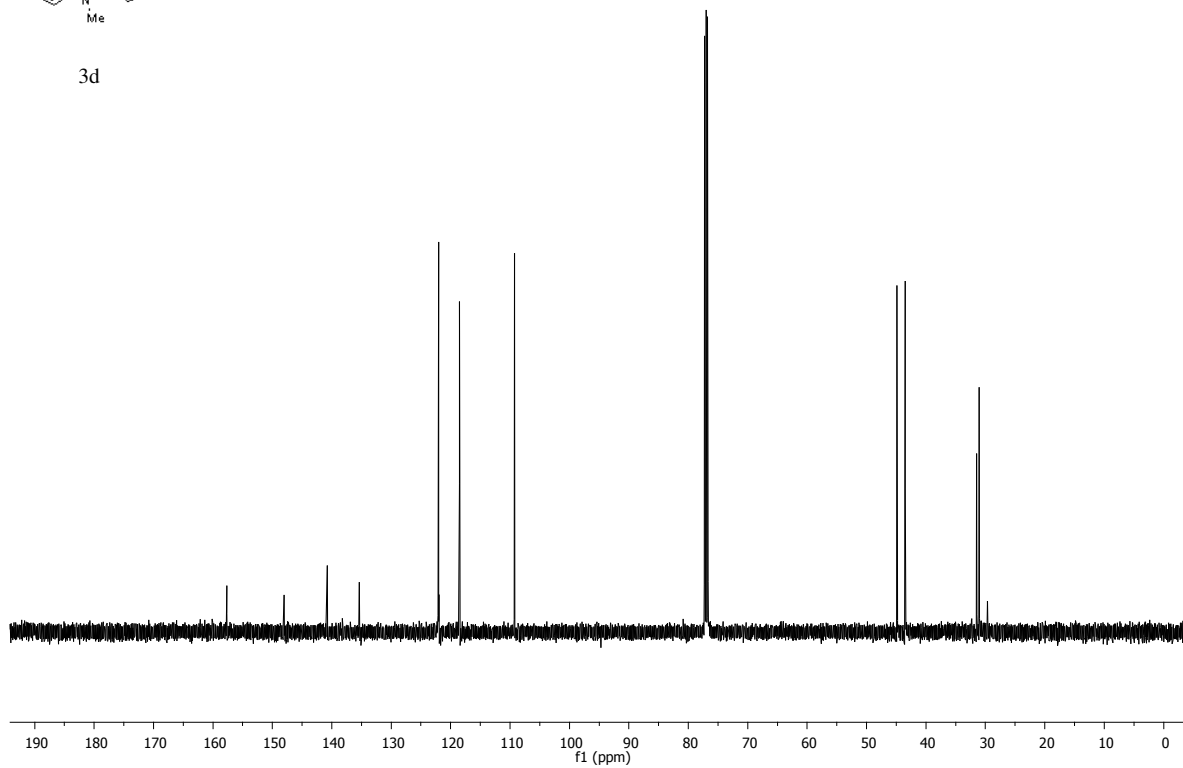

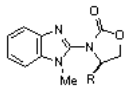

3e

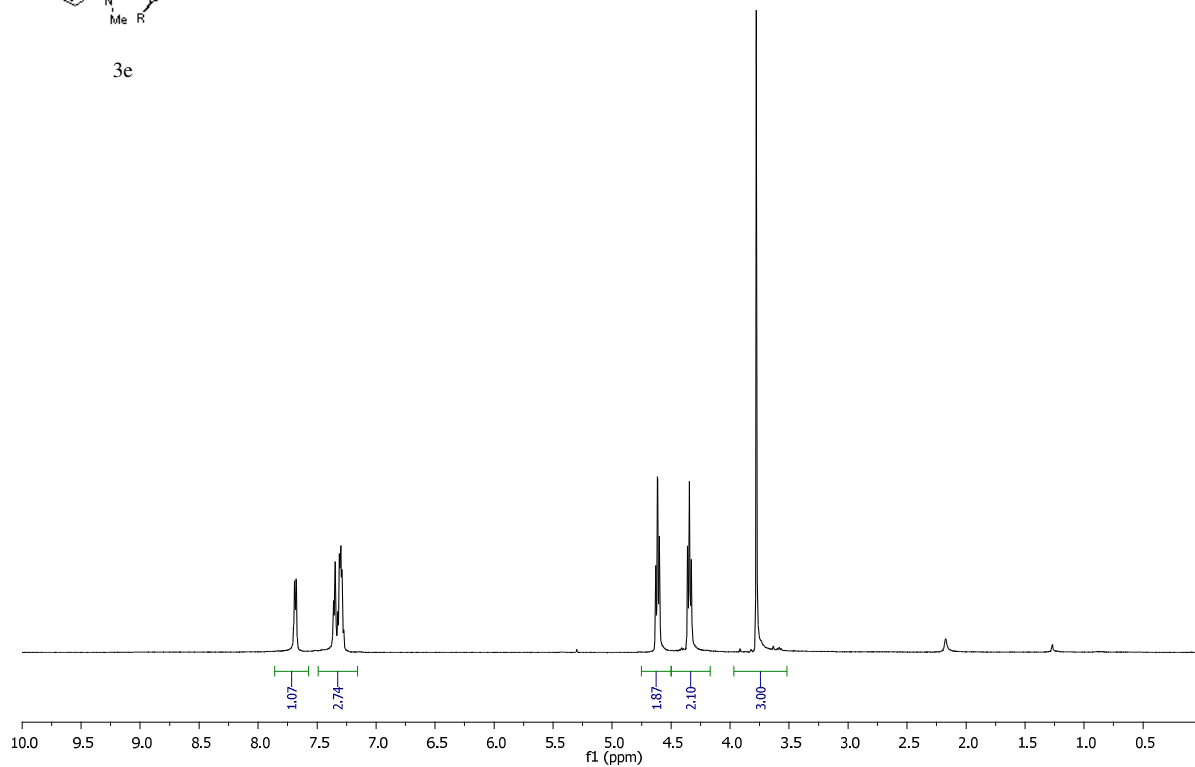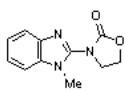

3e

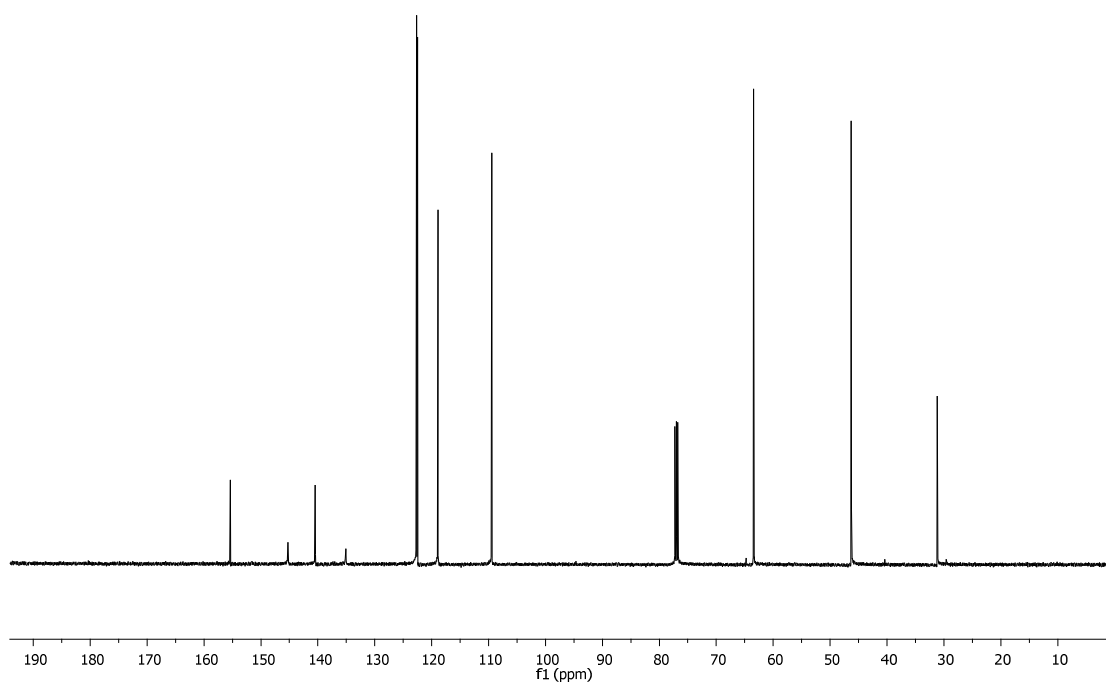

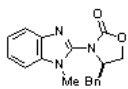

3f

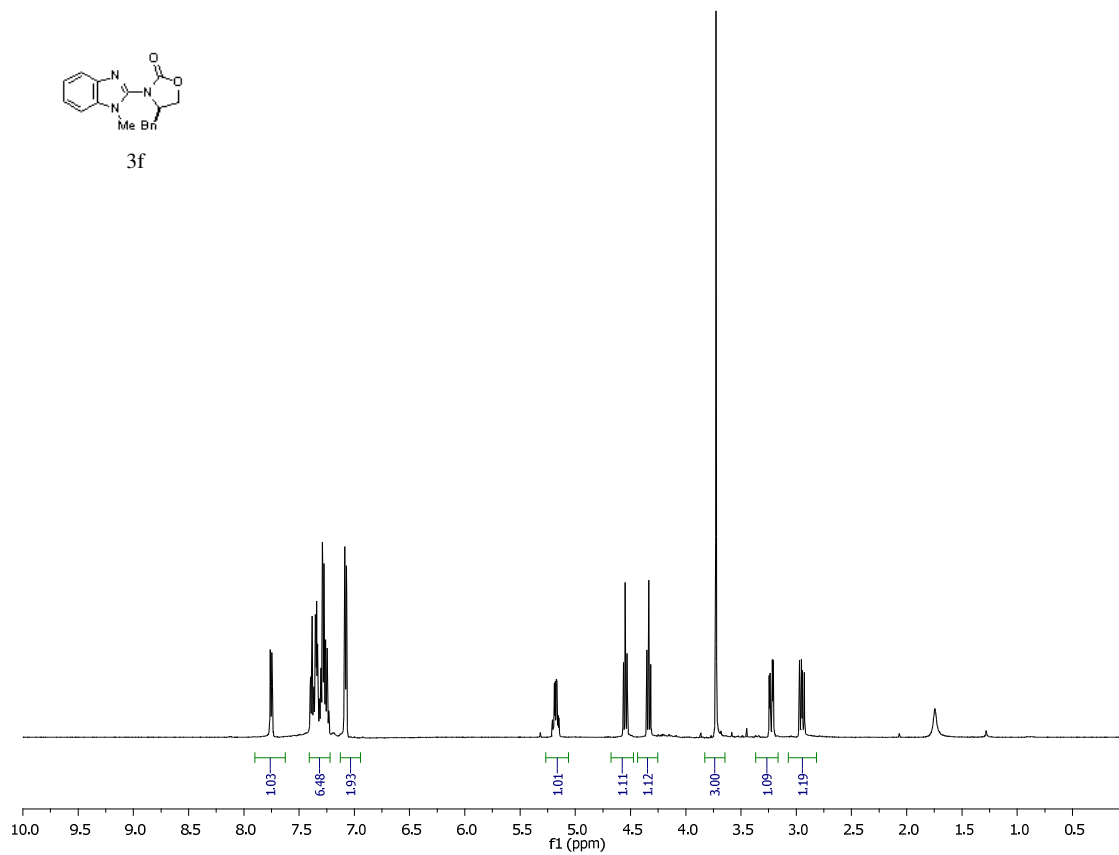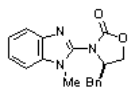

3f

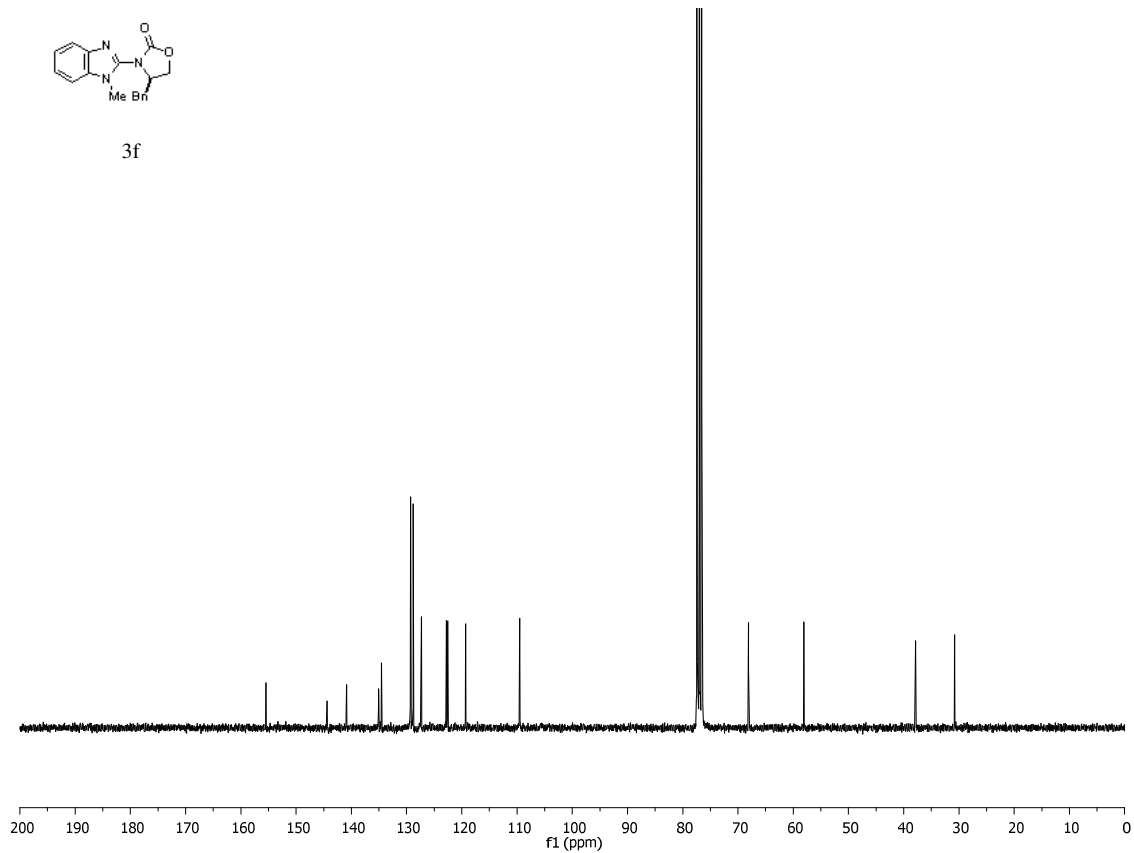

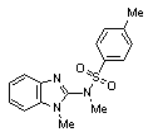

3g

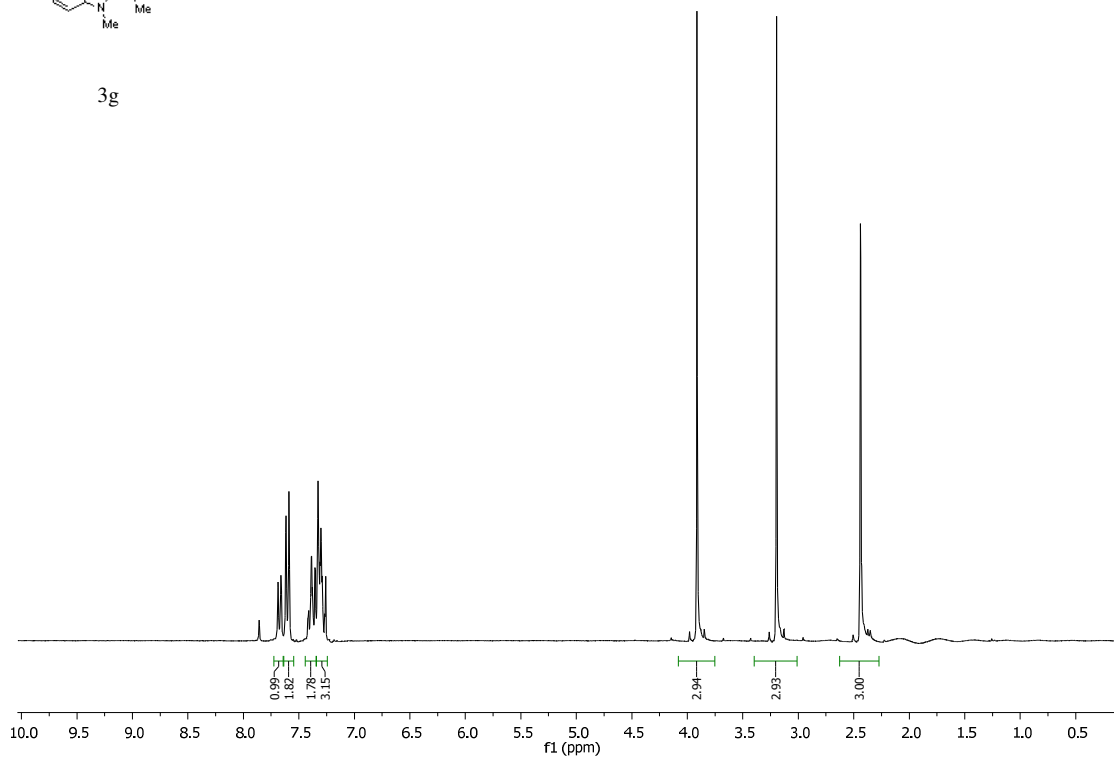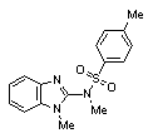

3g

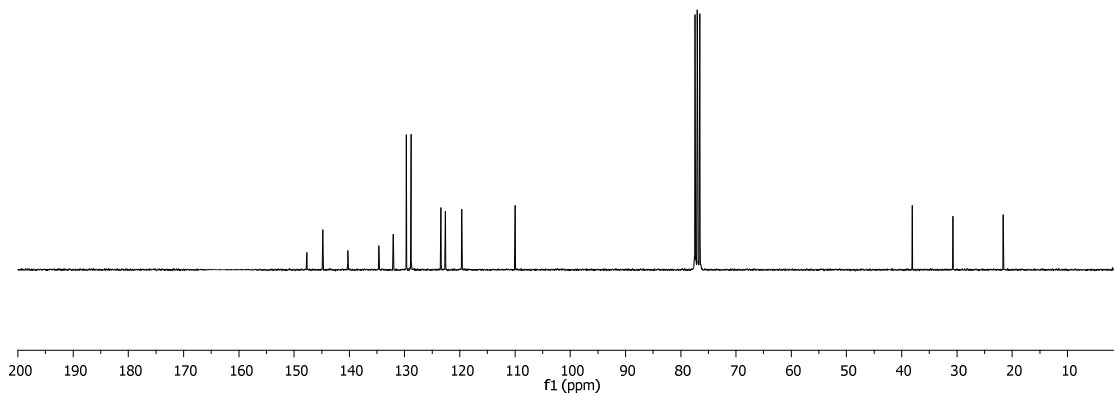

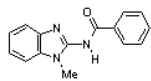

3h

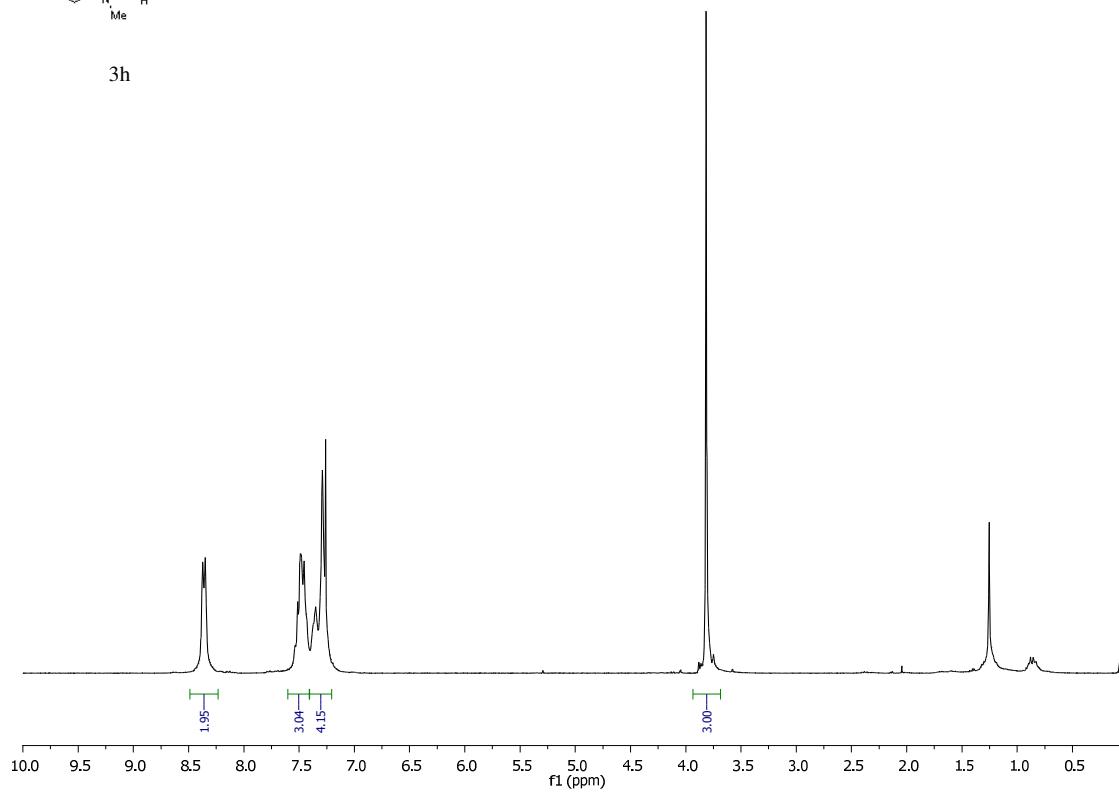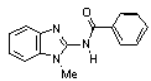

3h

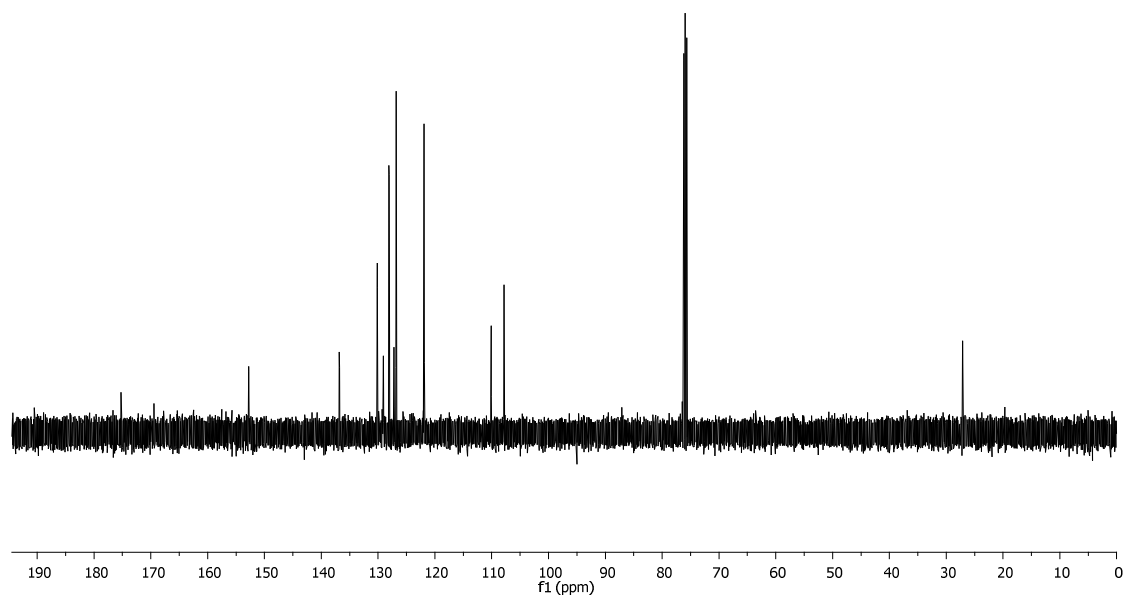



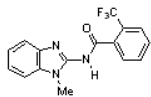

3i

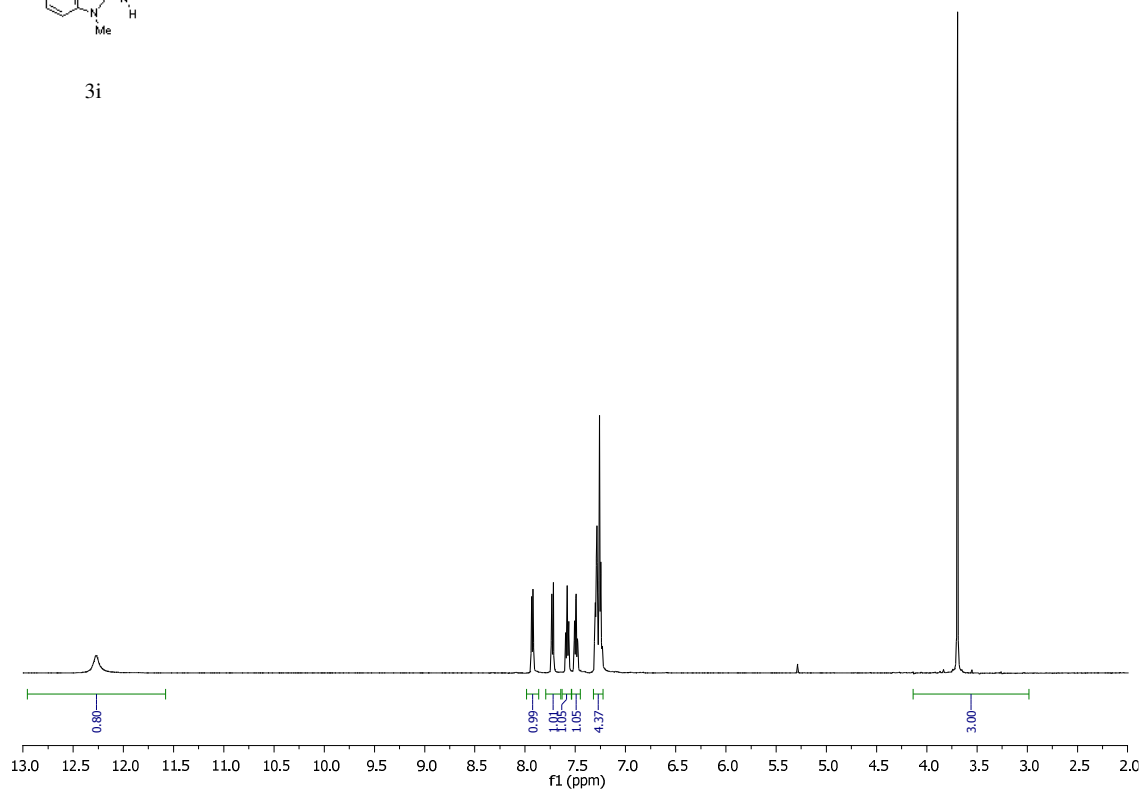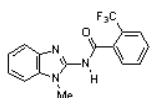

3i

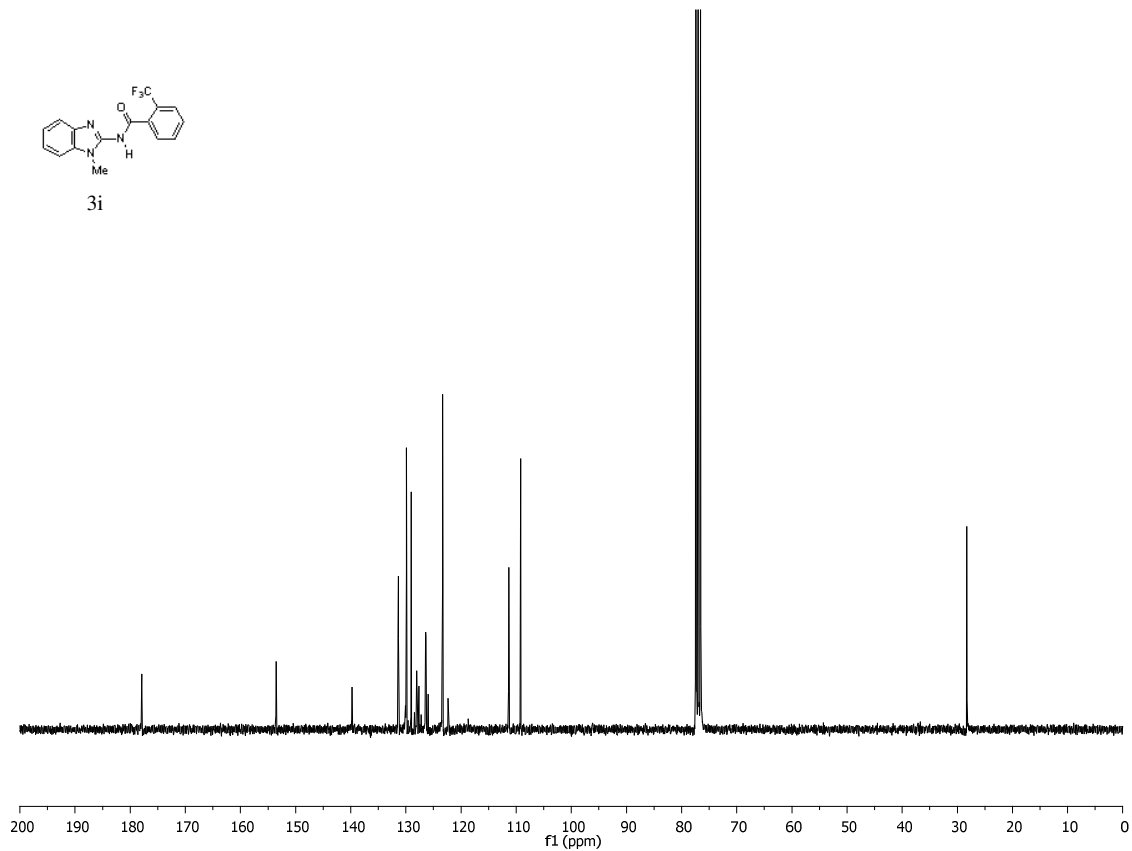

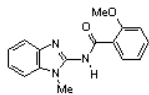

3j

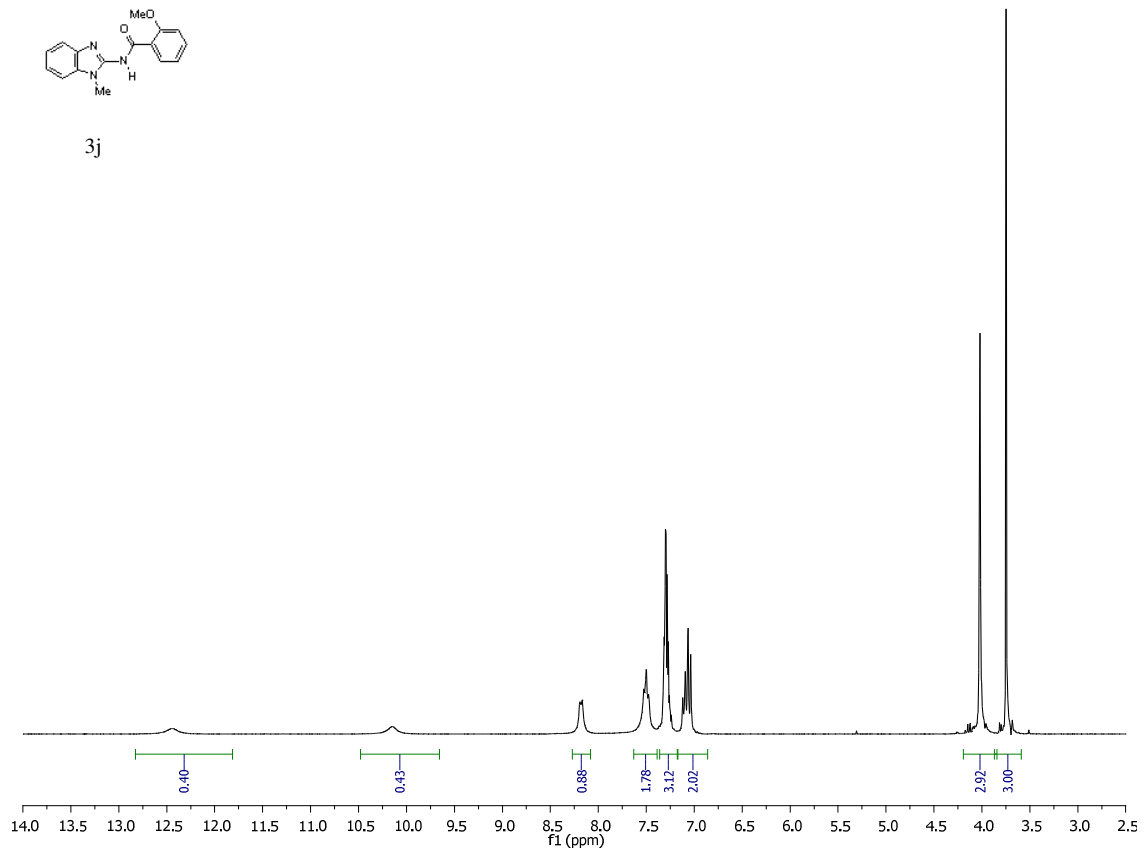

.esp

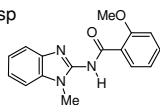

3j

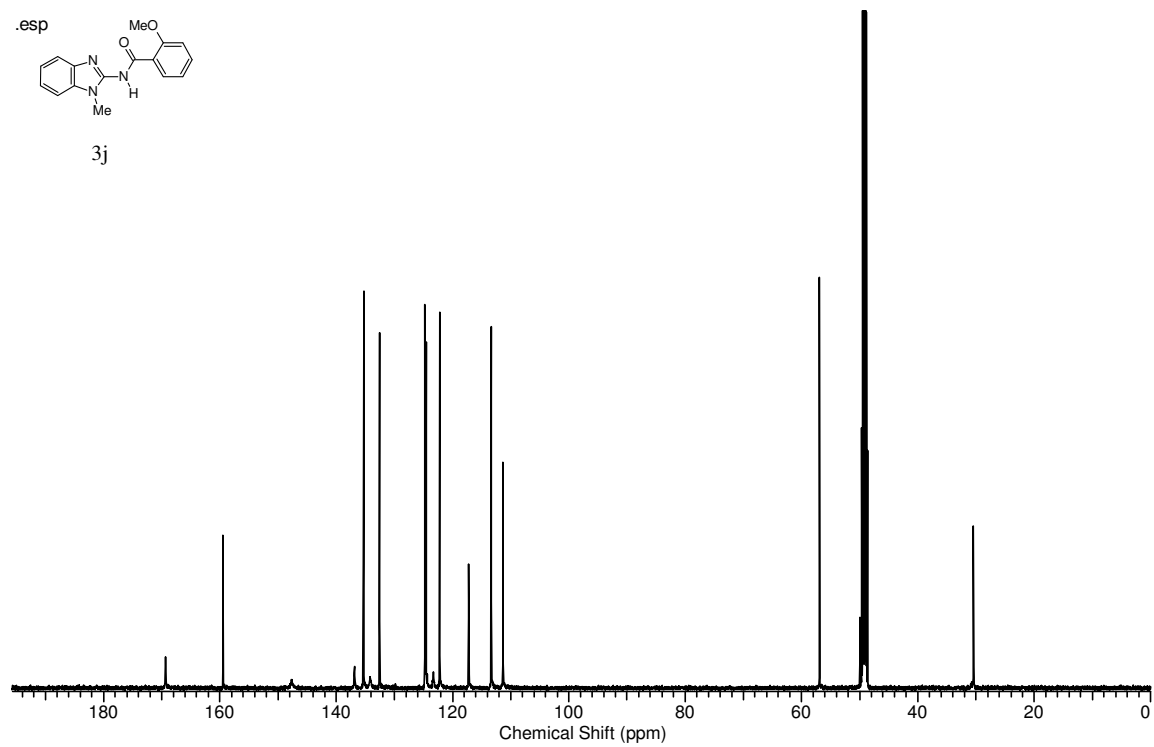

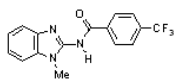

3k

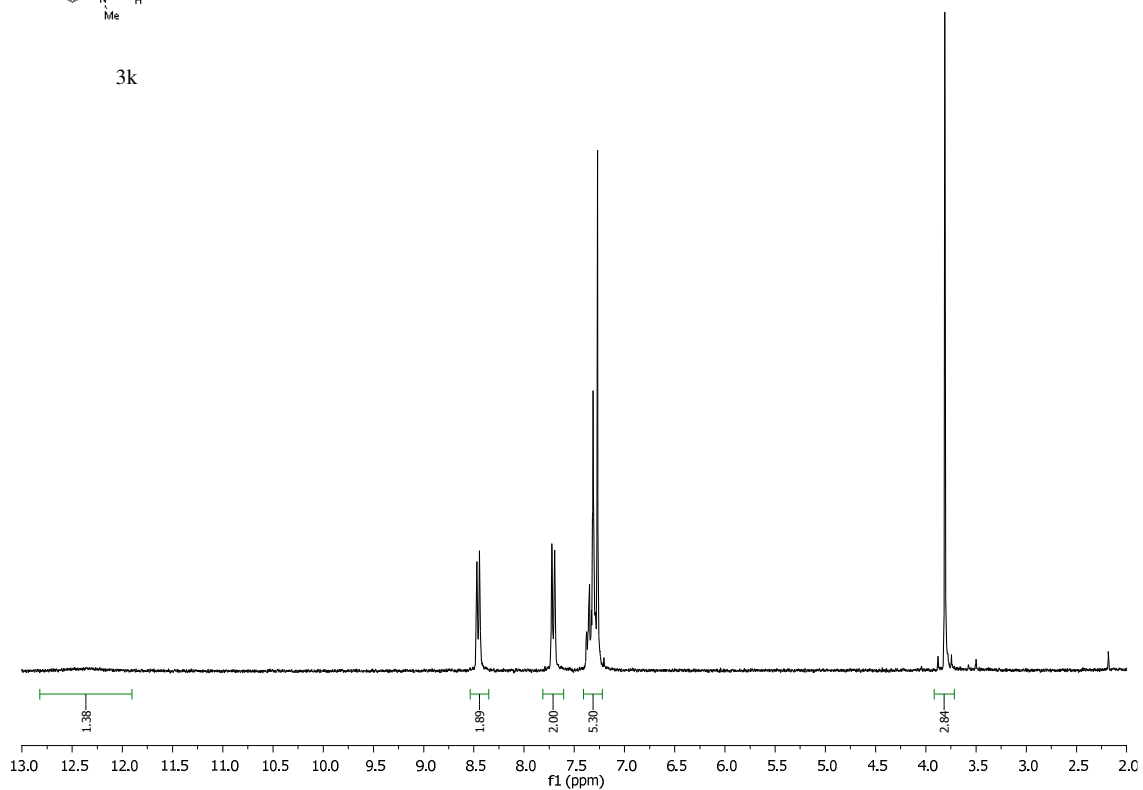

.esp

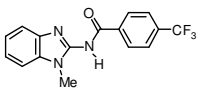

3k

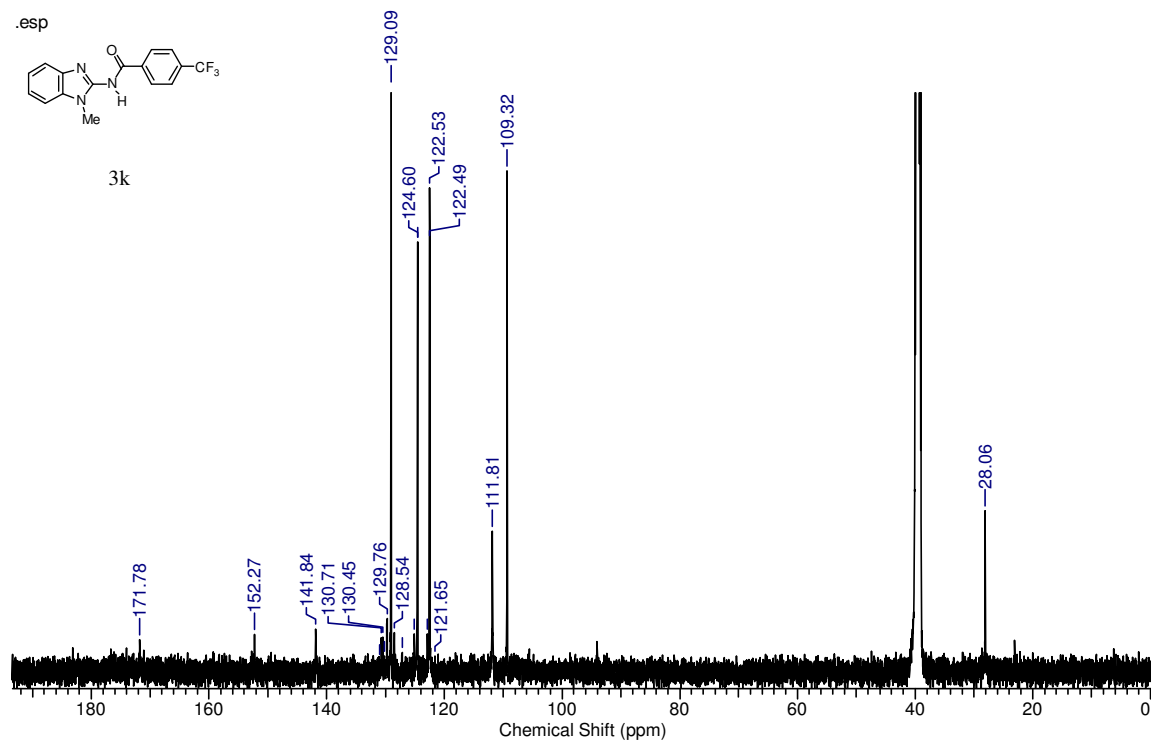

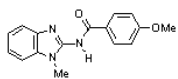

31

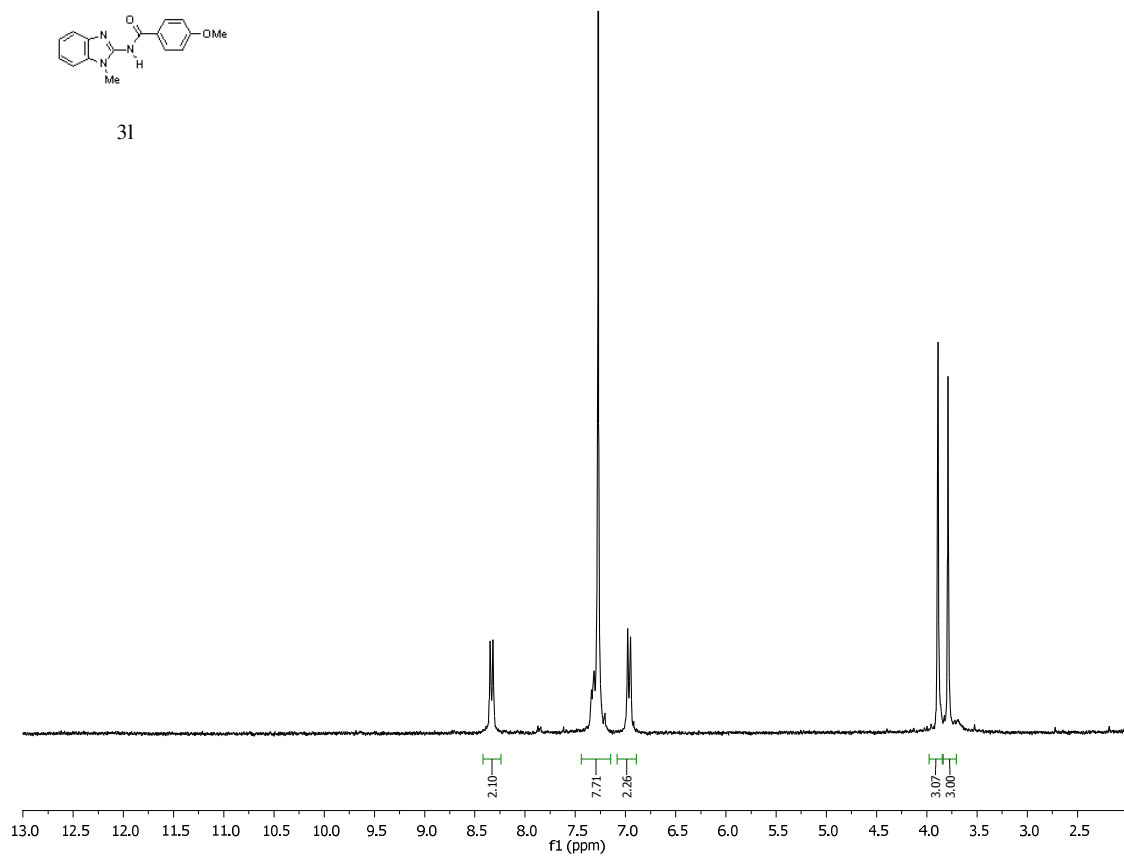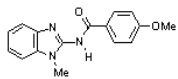

31

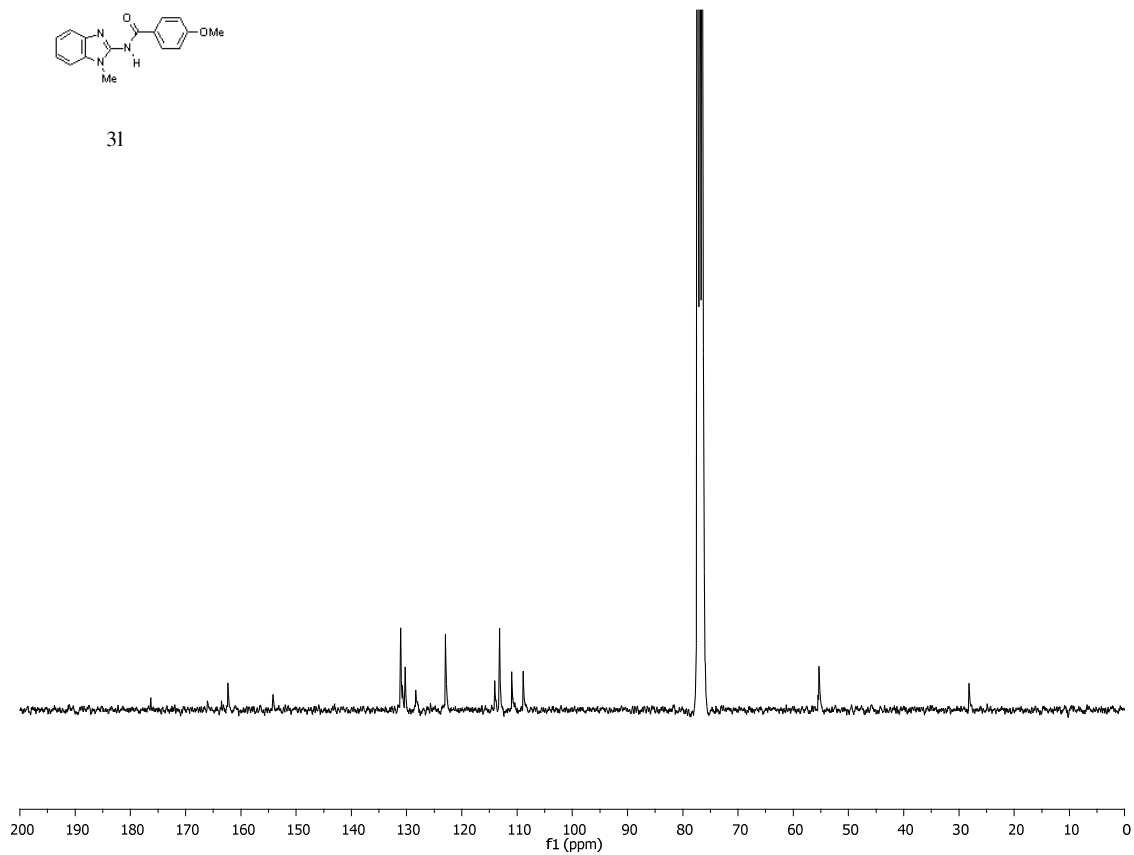

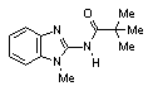

3m

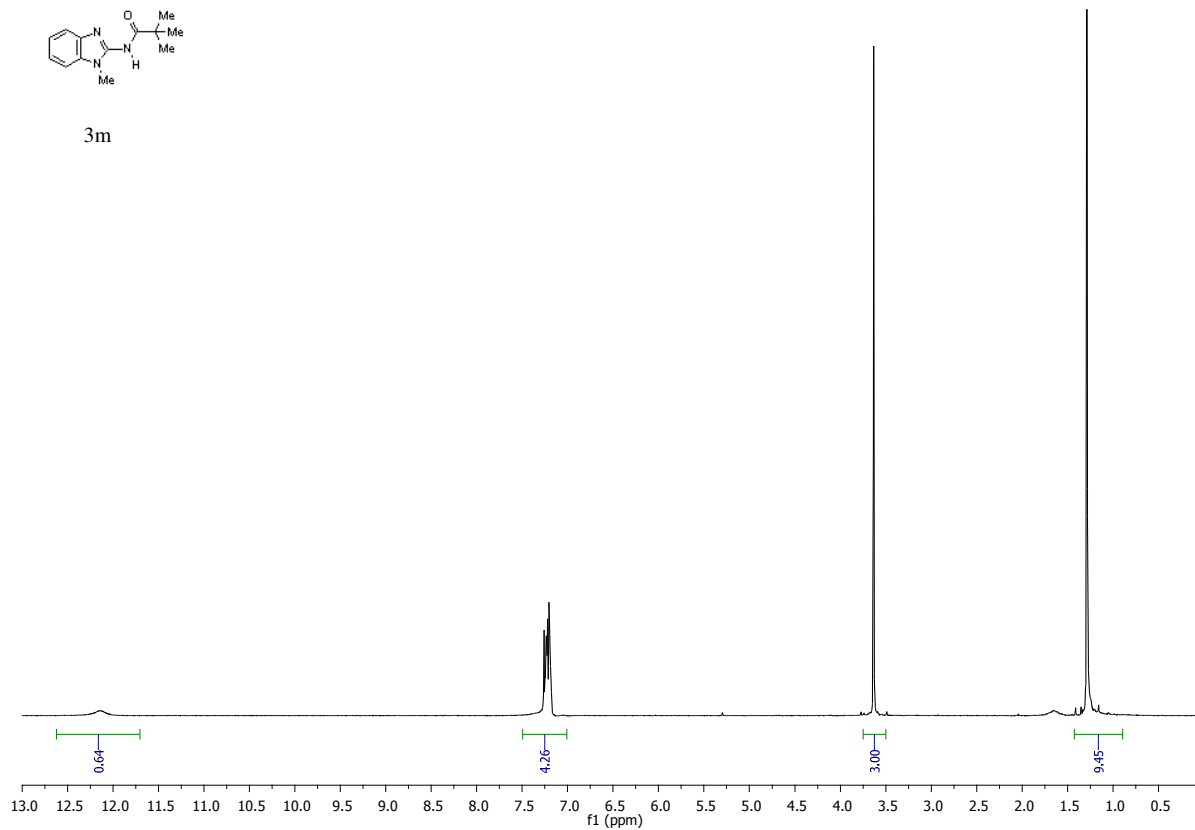

.esp

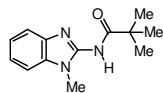

3m

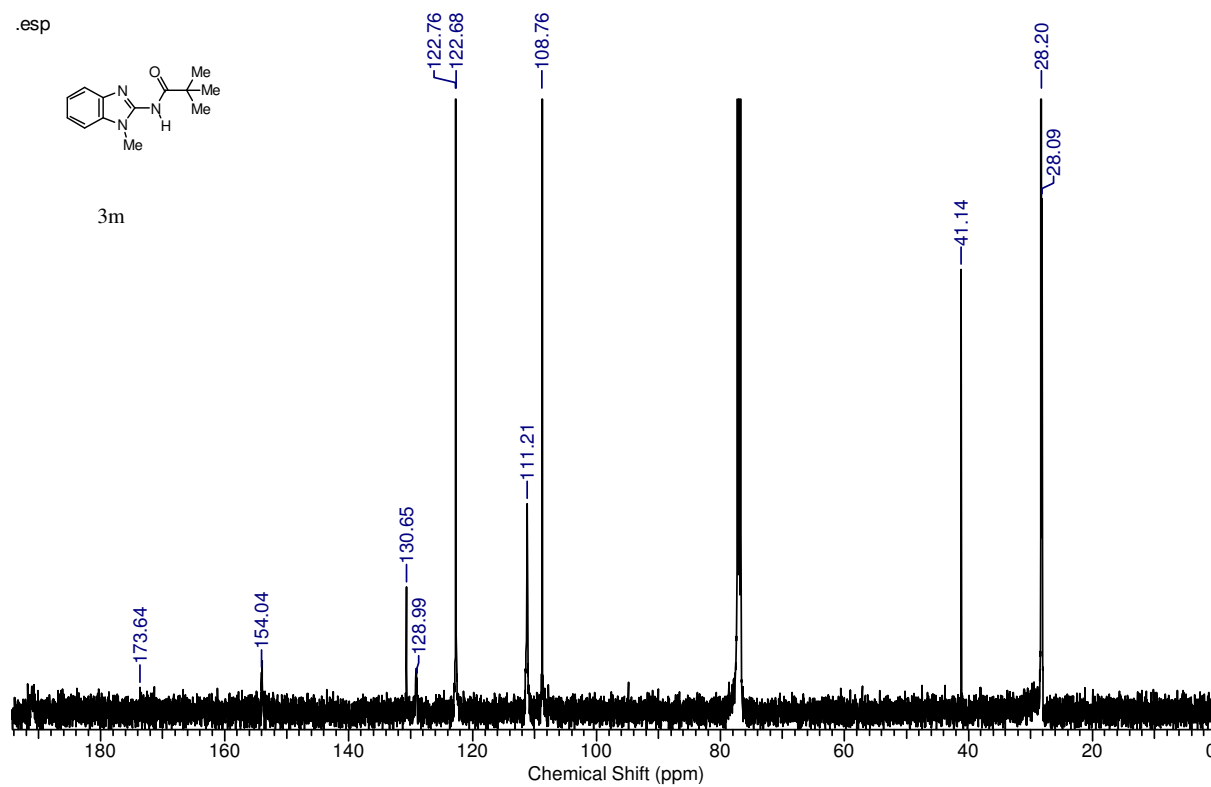

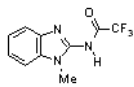

3n

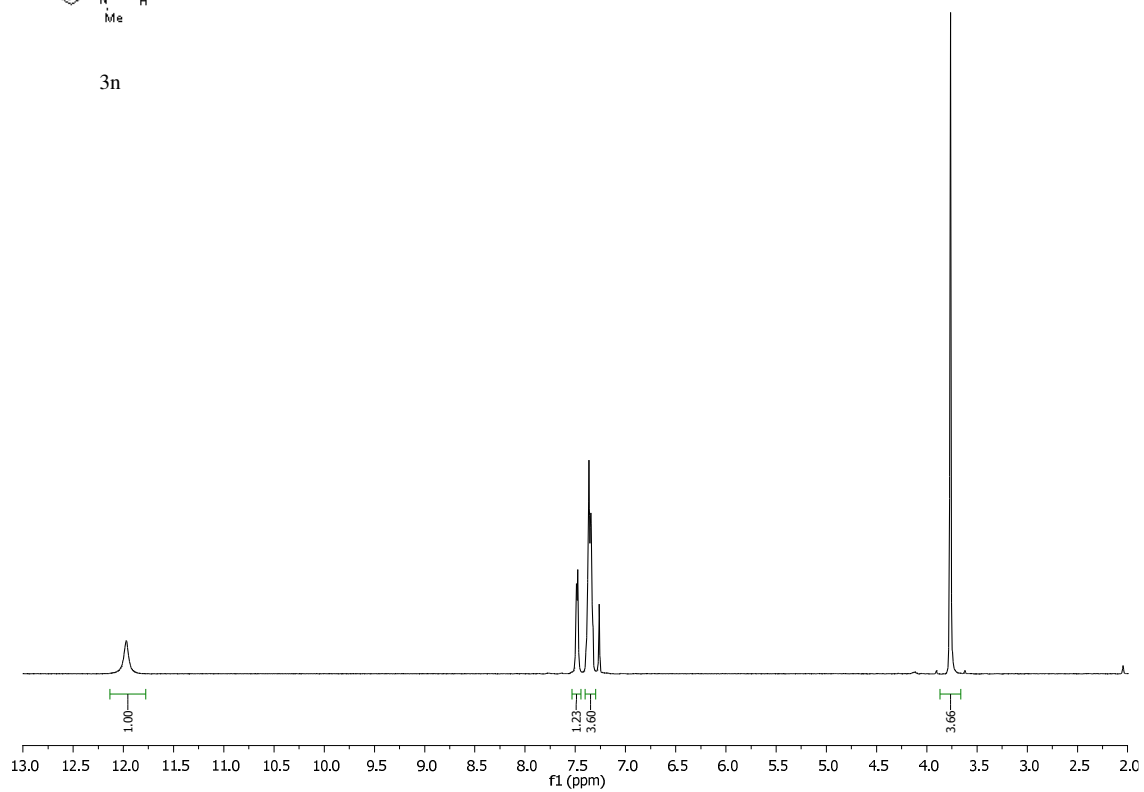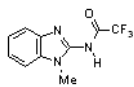

3n

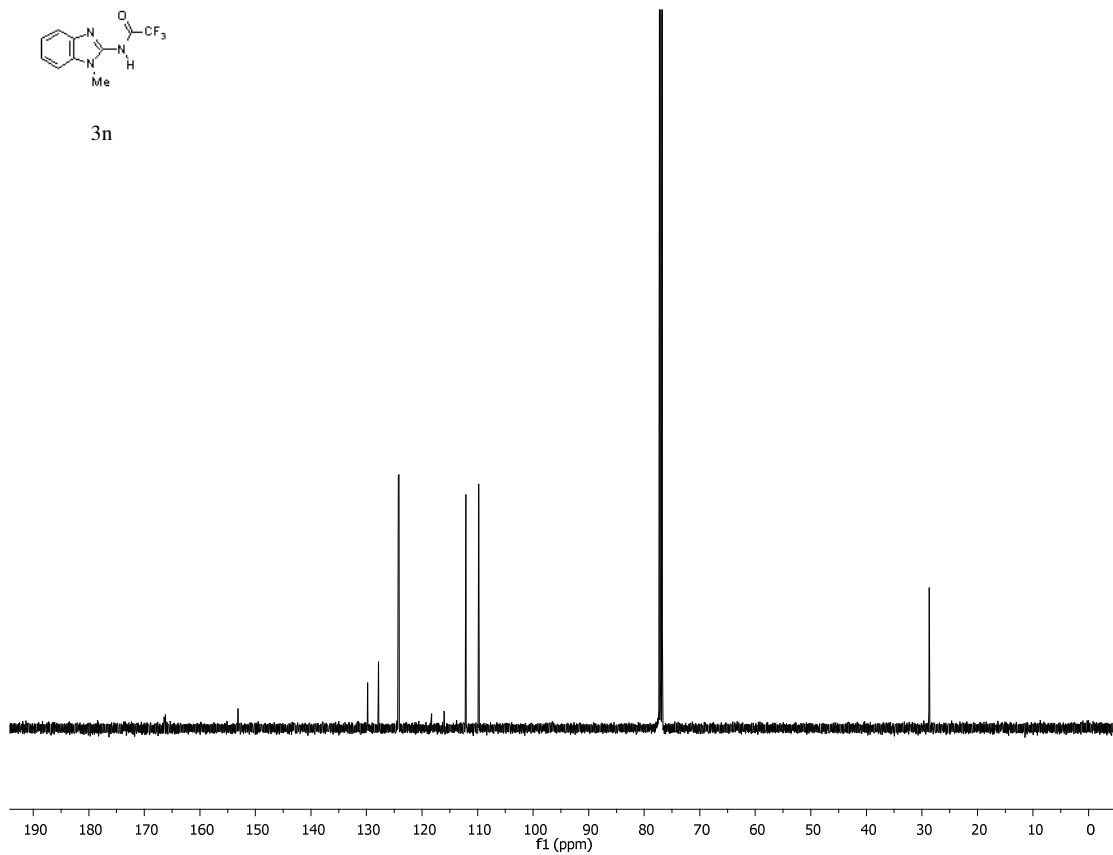

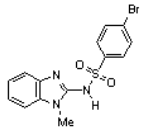

3o

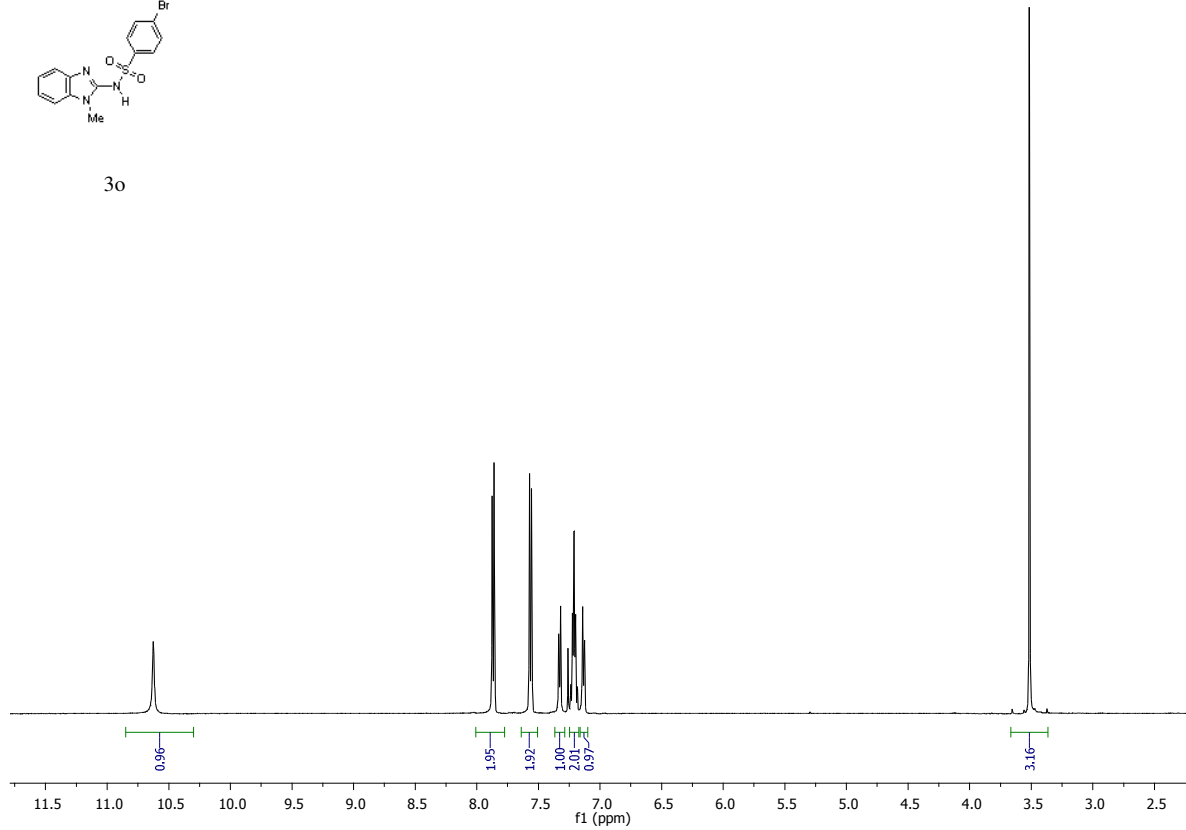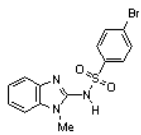

3o

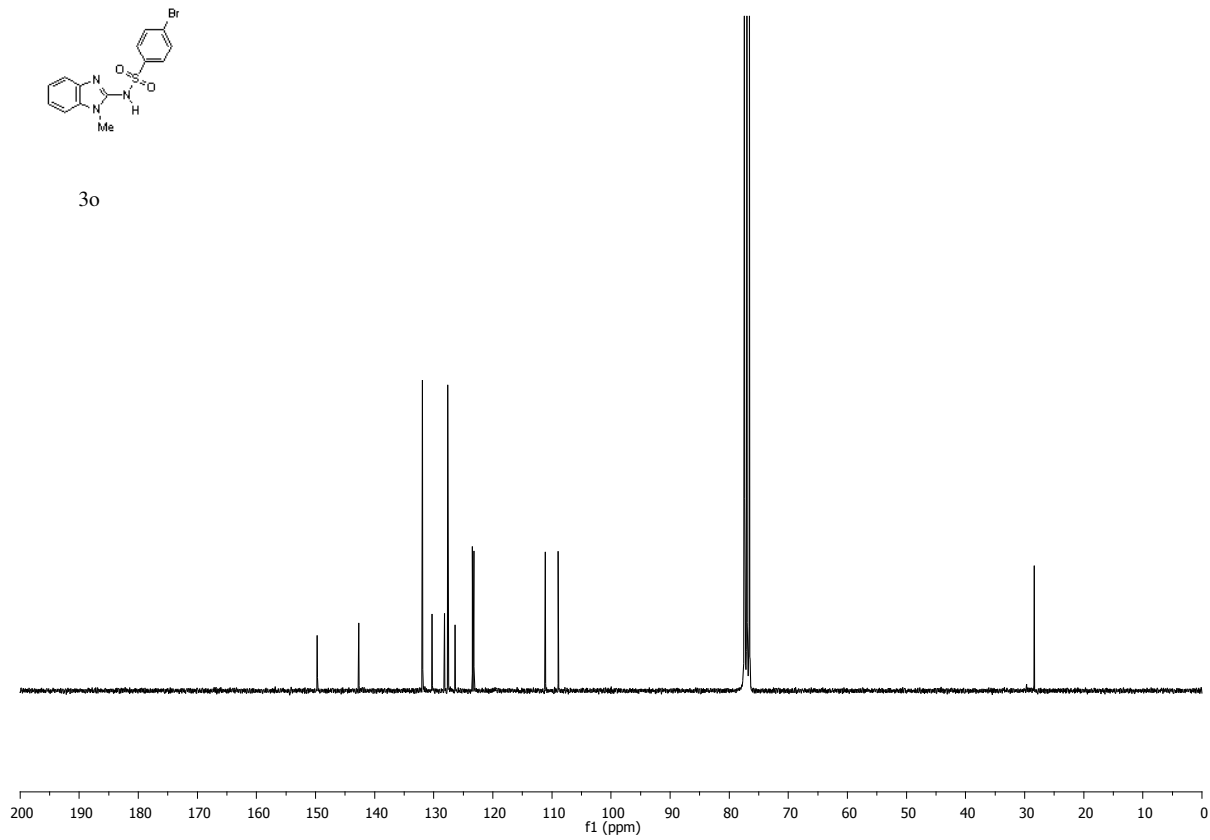

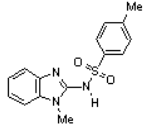

3p

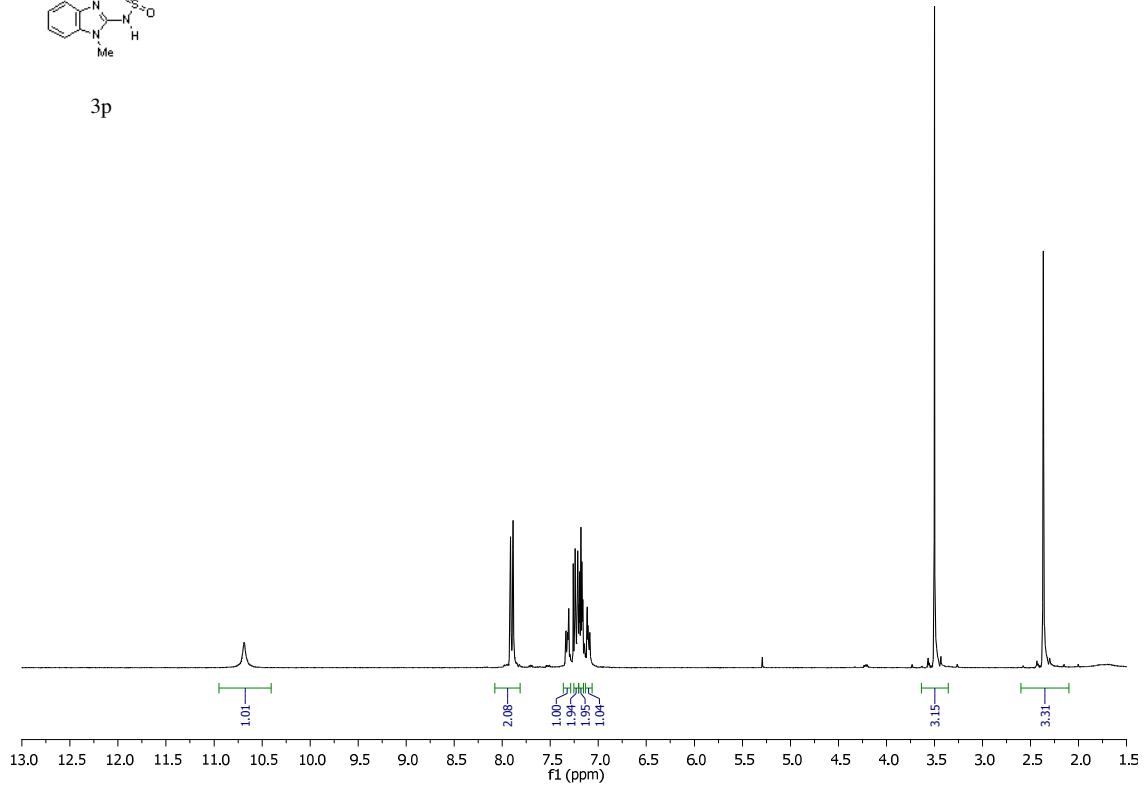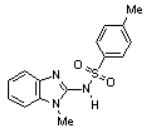

3p

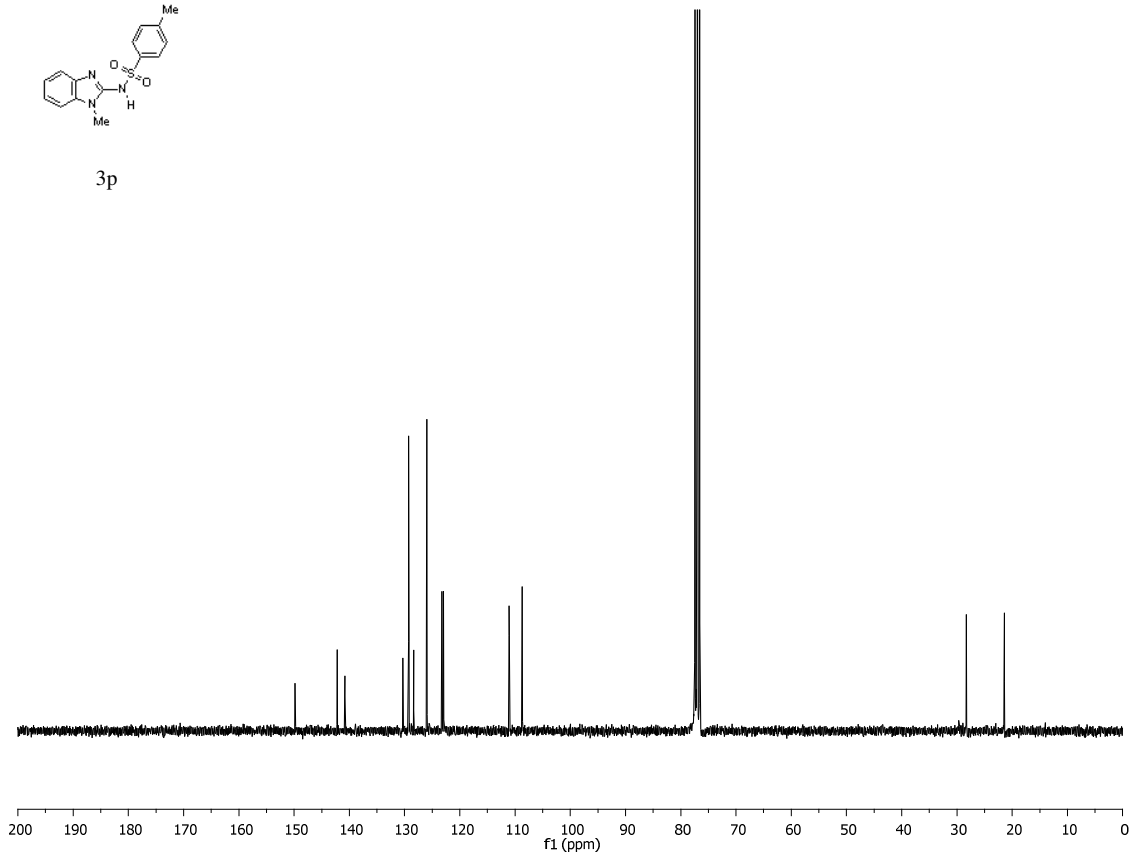



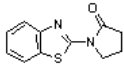

5a

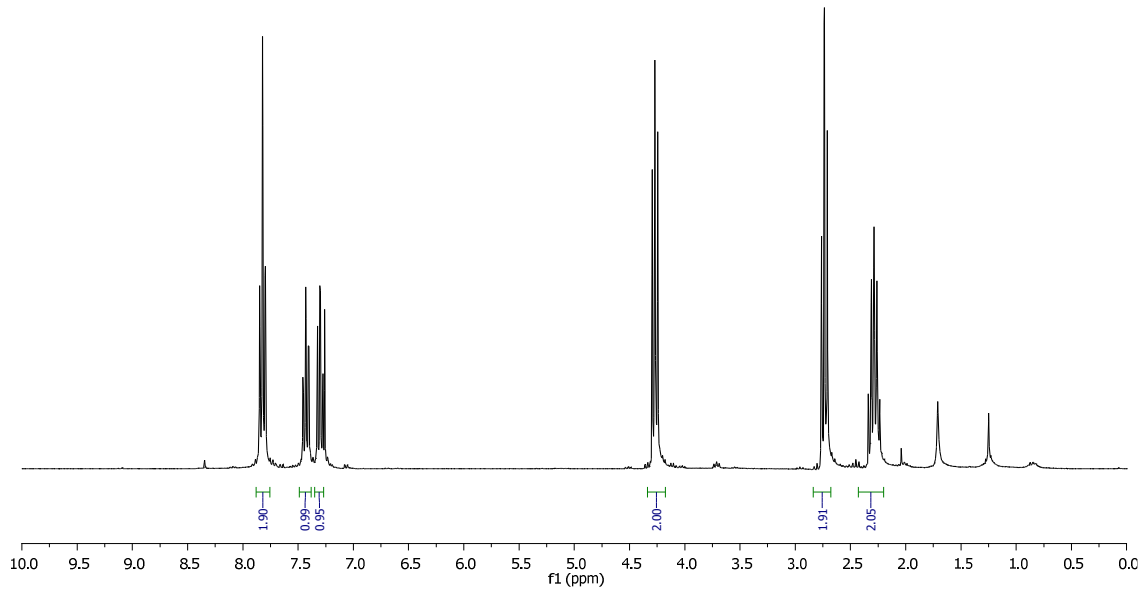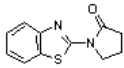

5a

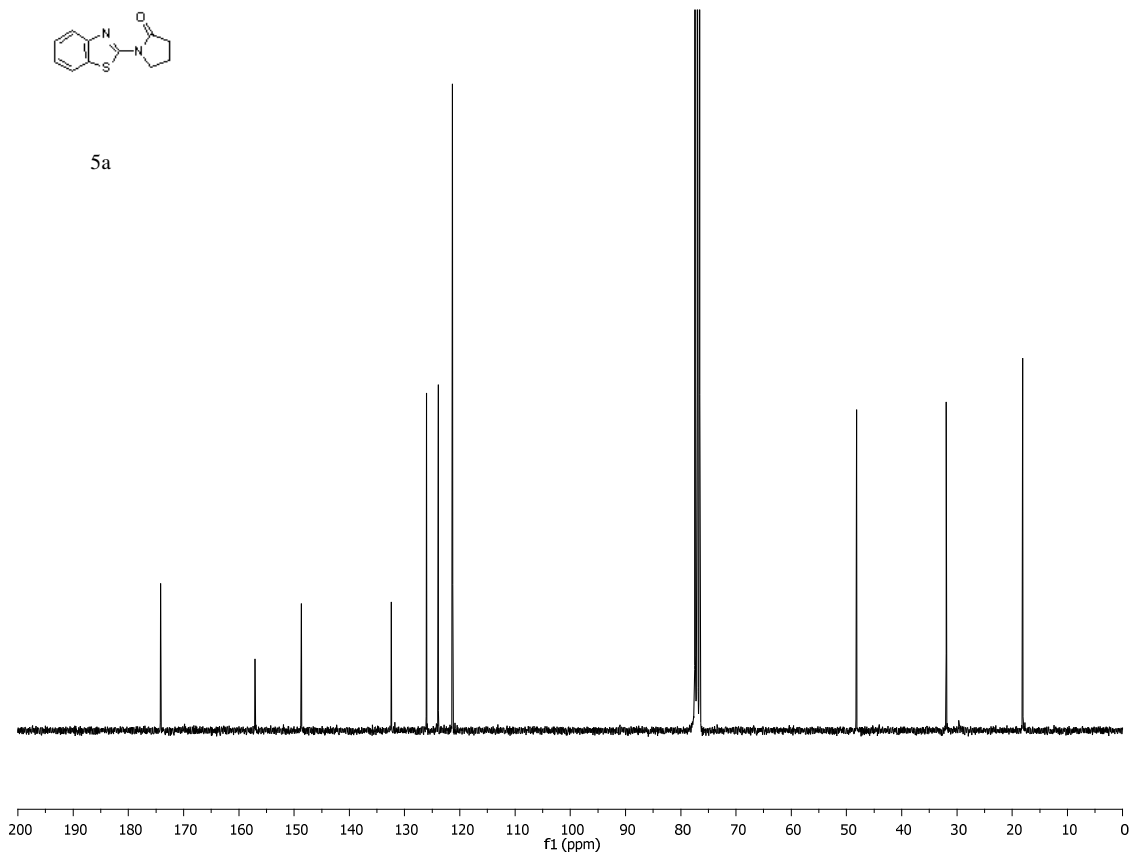

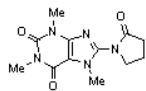

6a

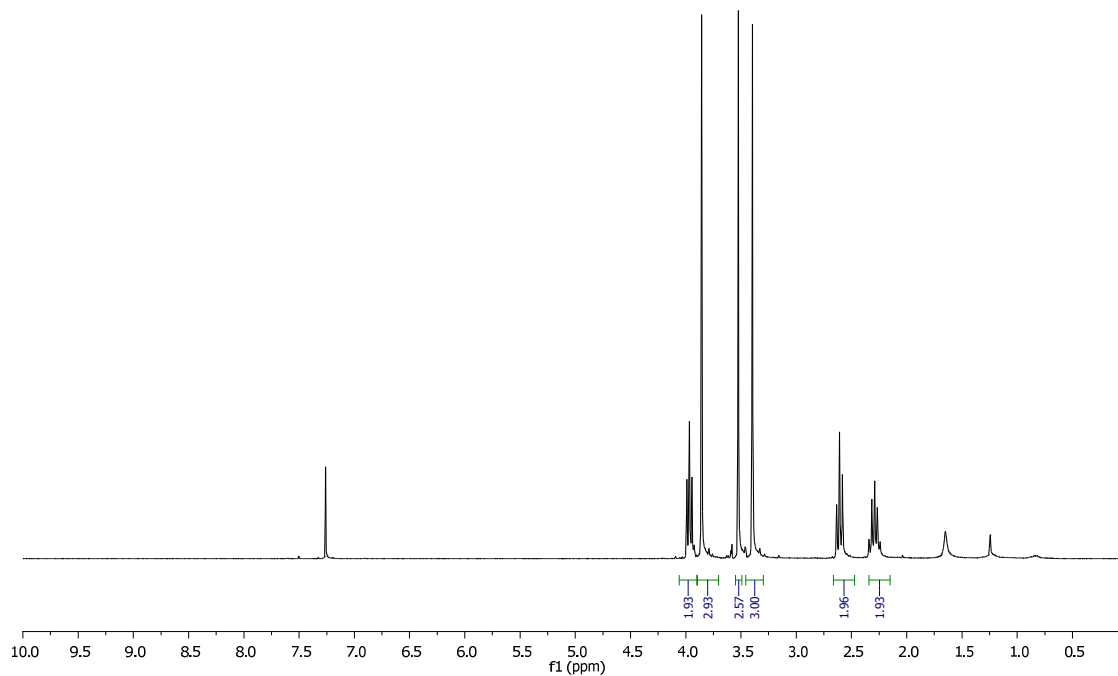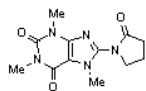

6a

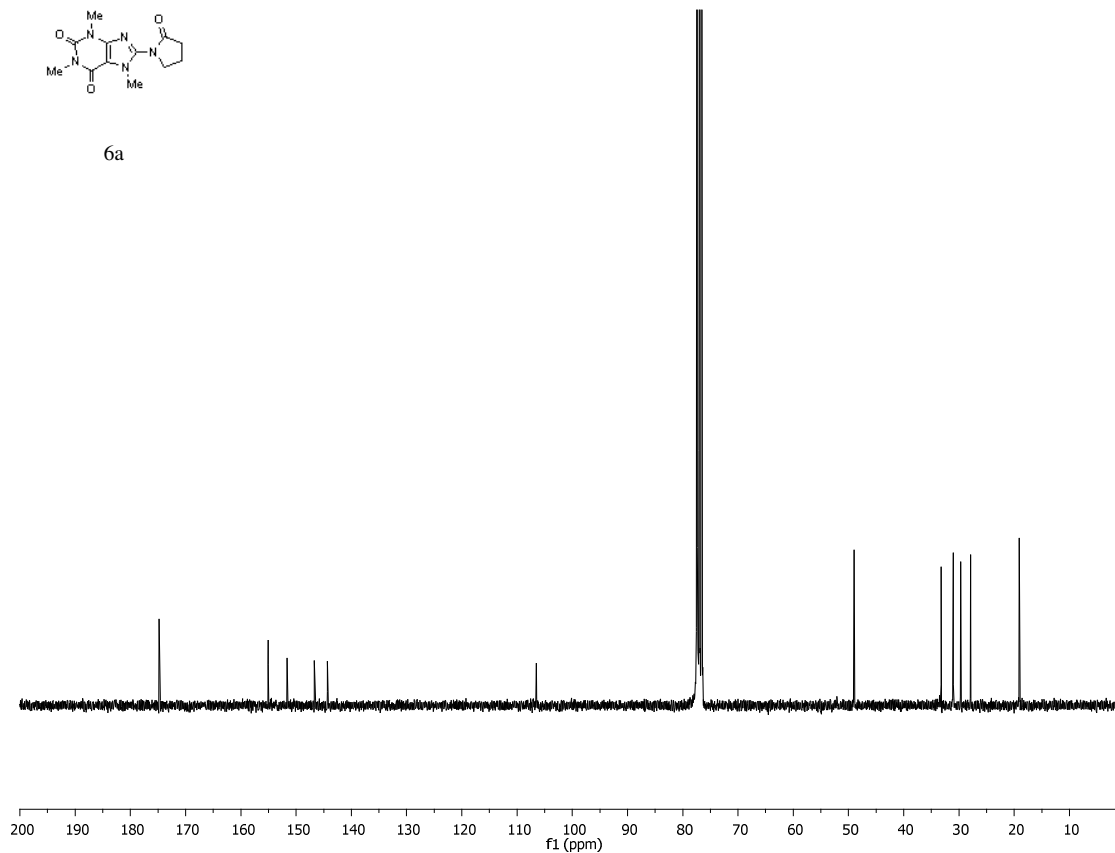

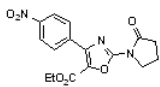

7a

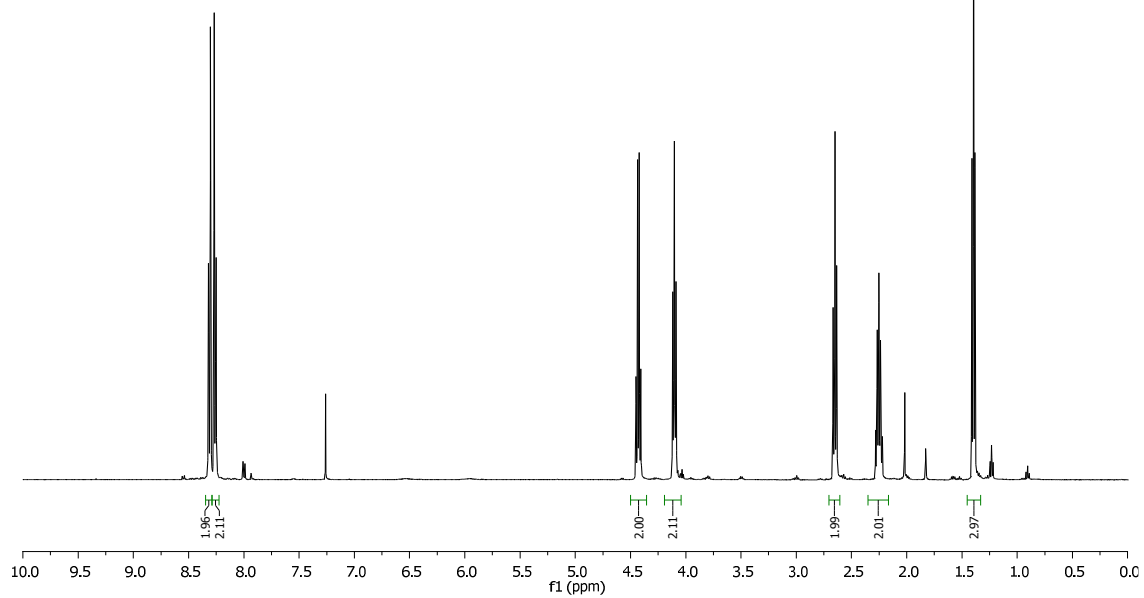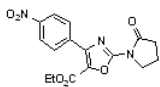

7a

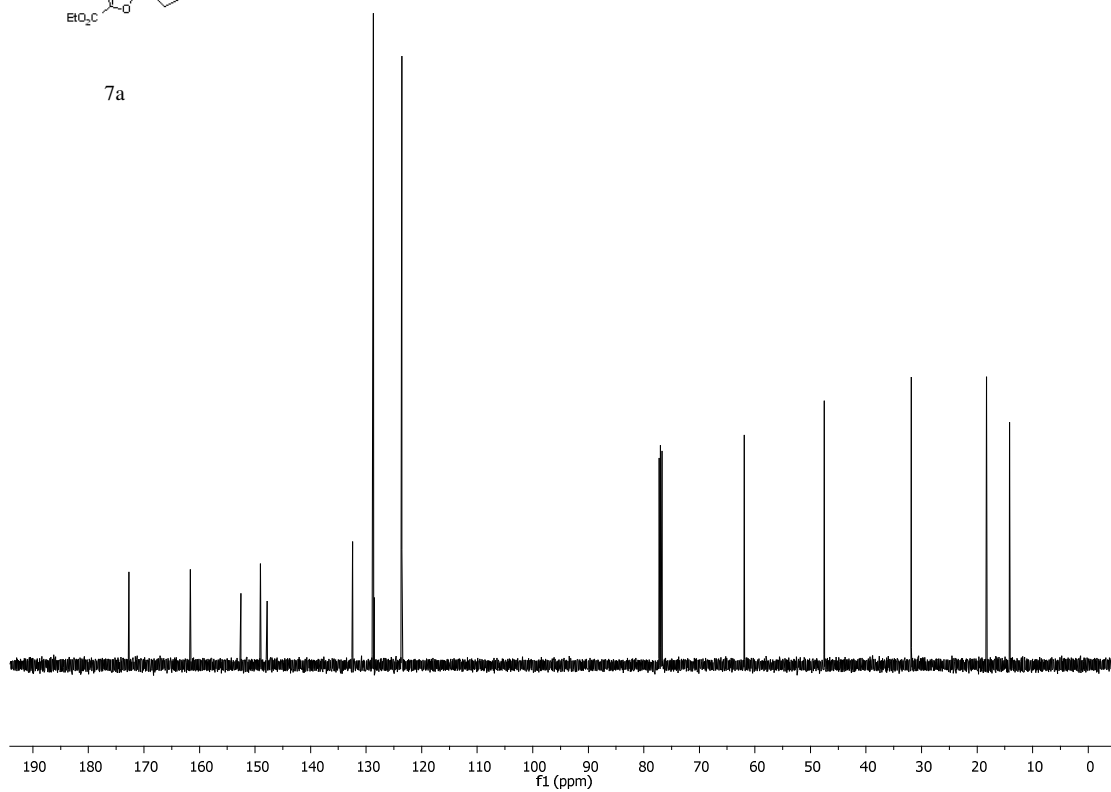

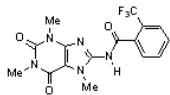

6i

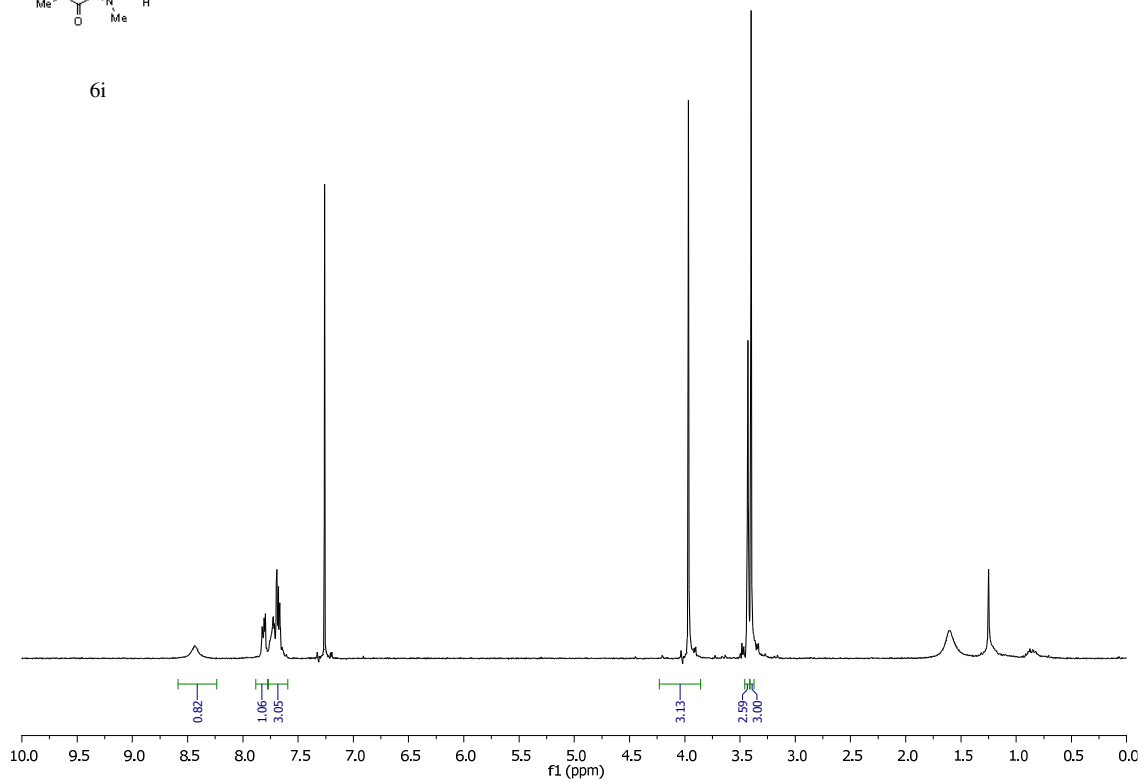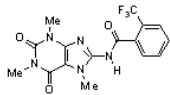

6i

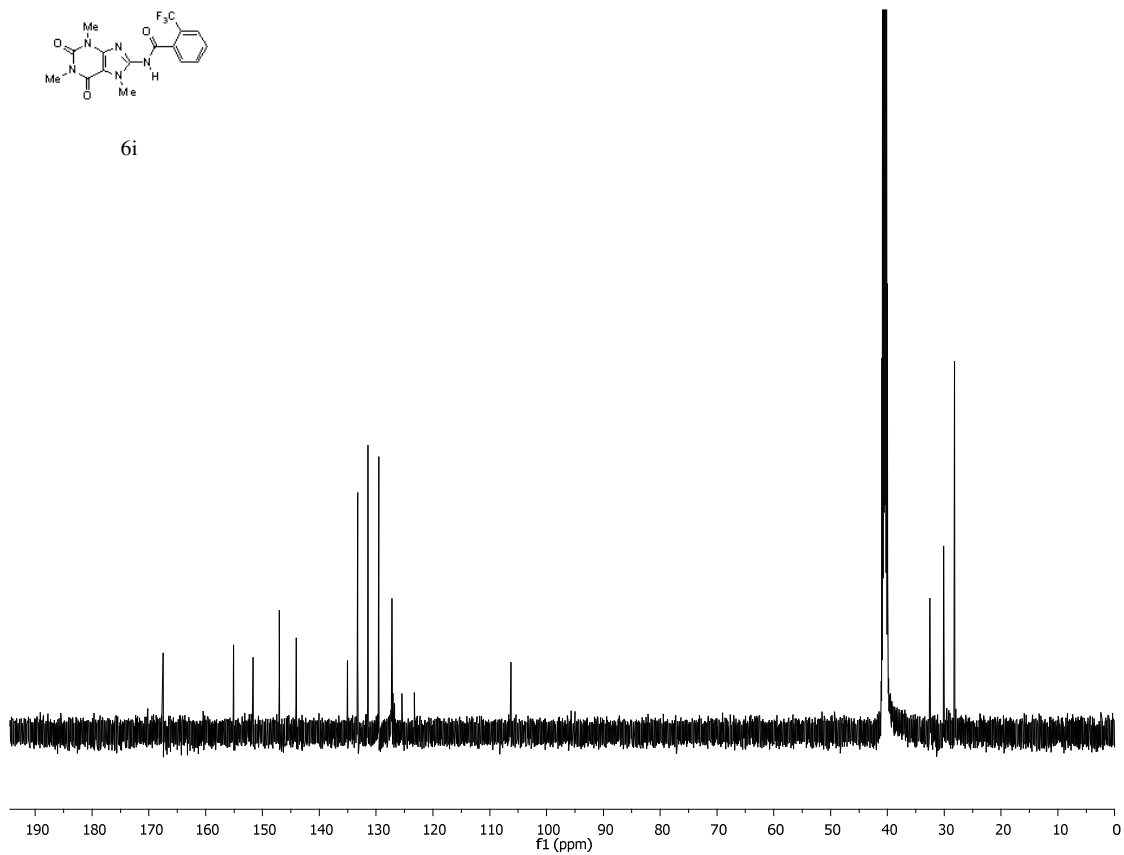

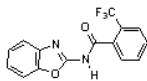

8i

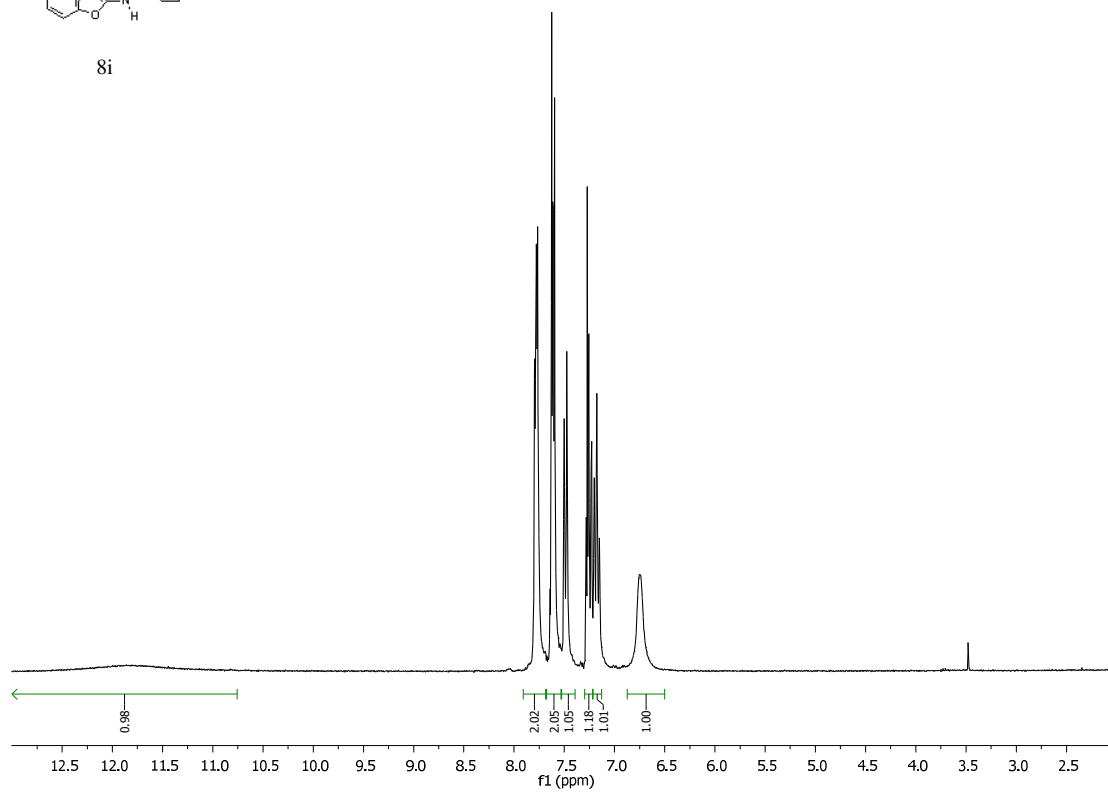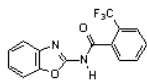

8i

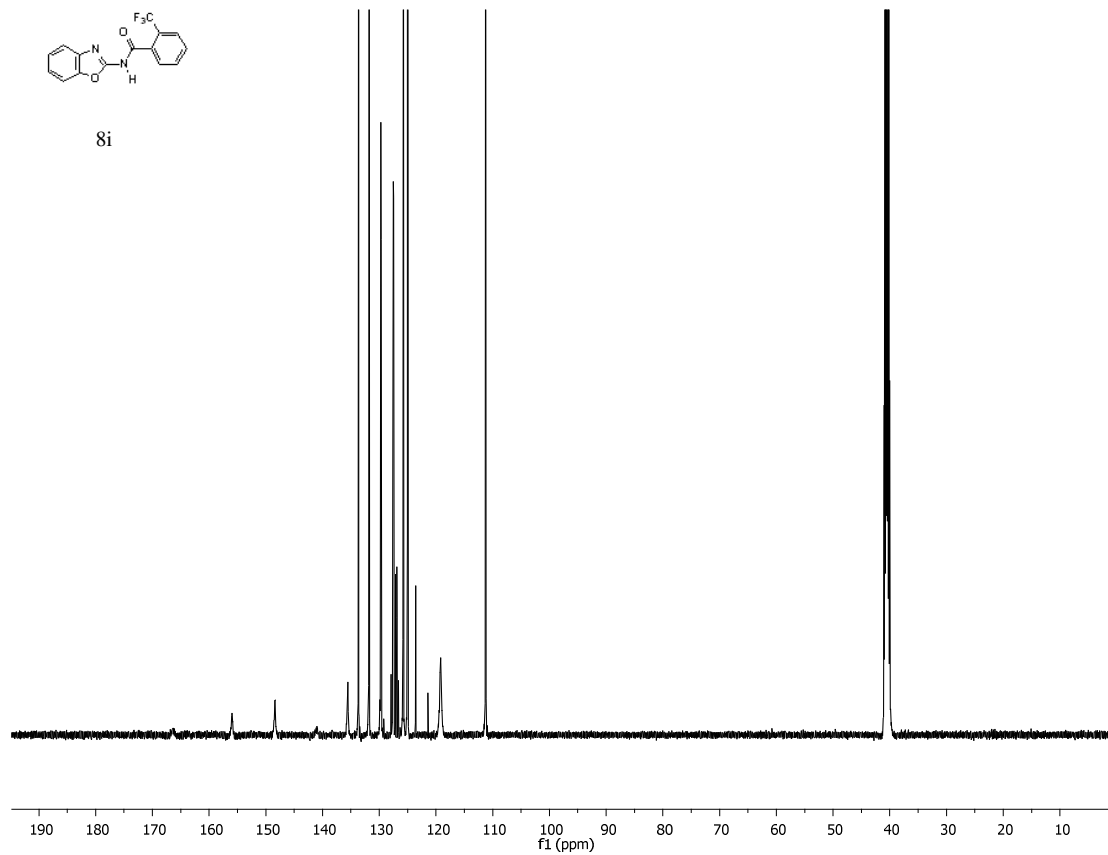

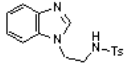

9

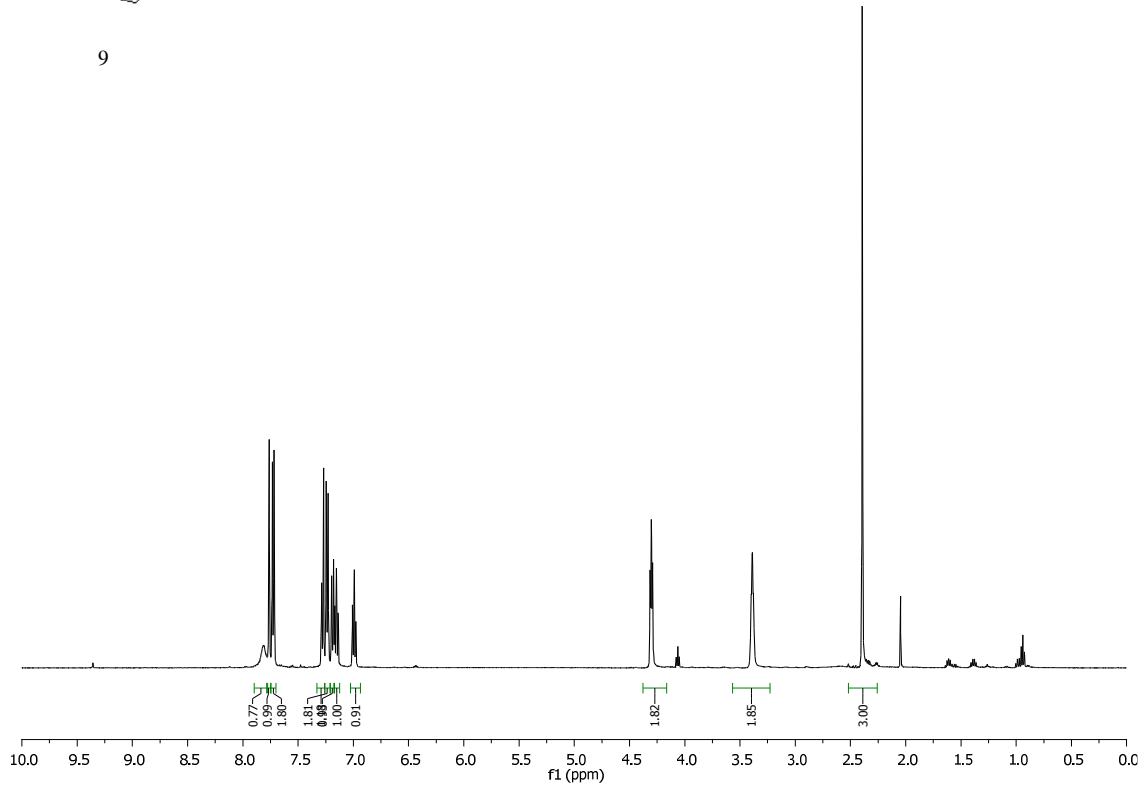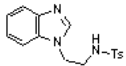

9

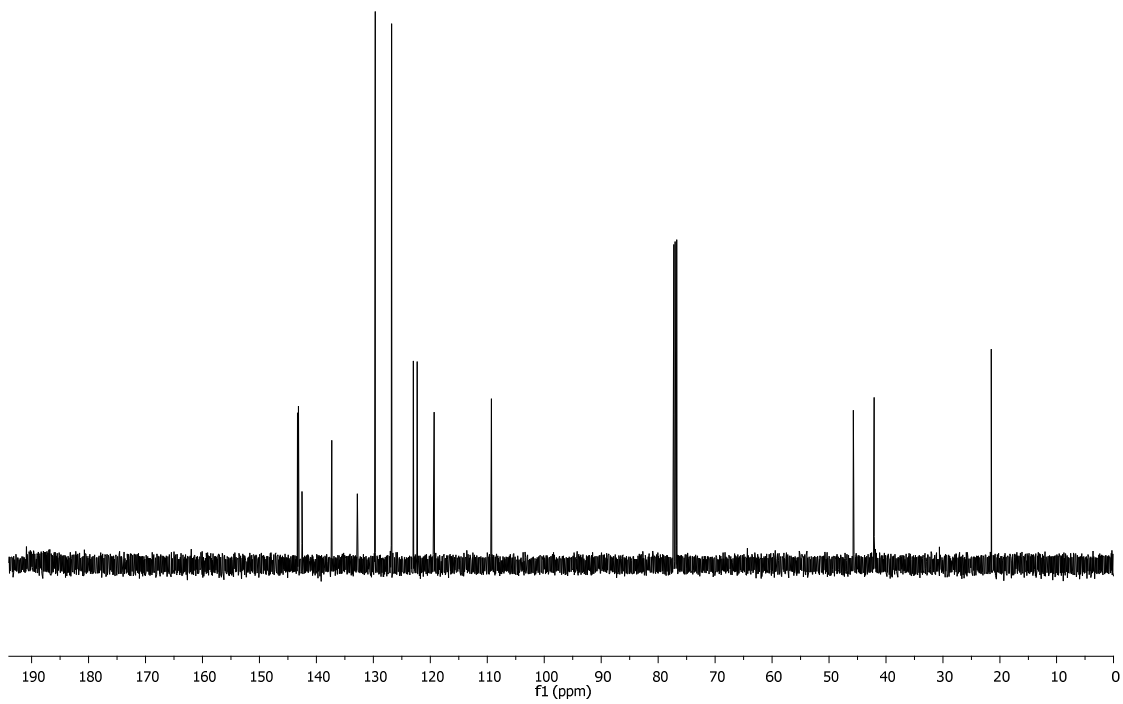

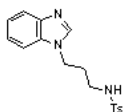

10

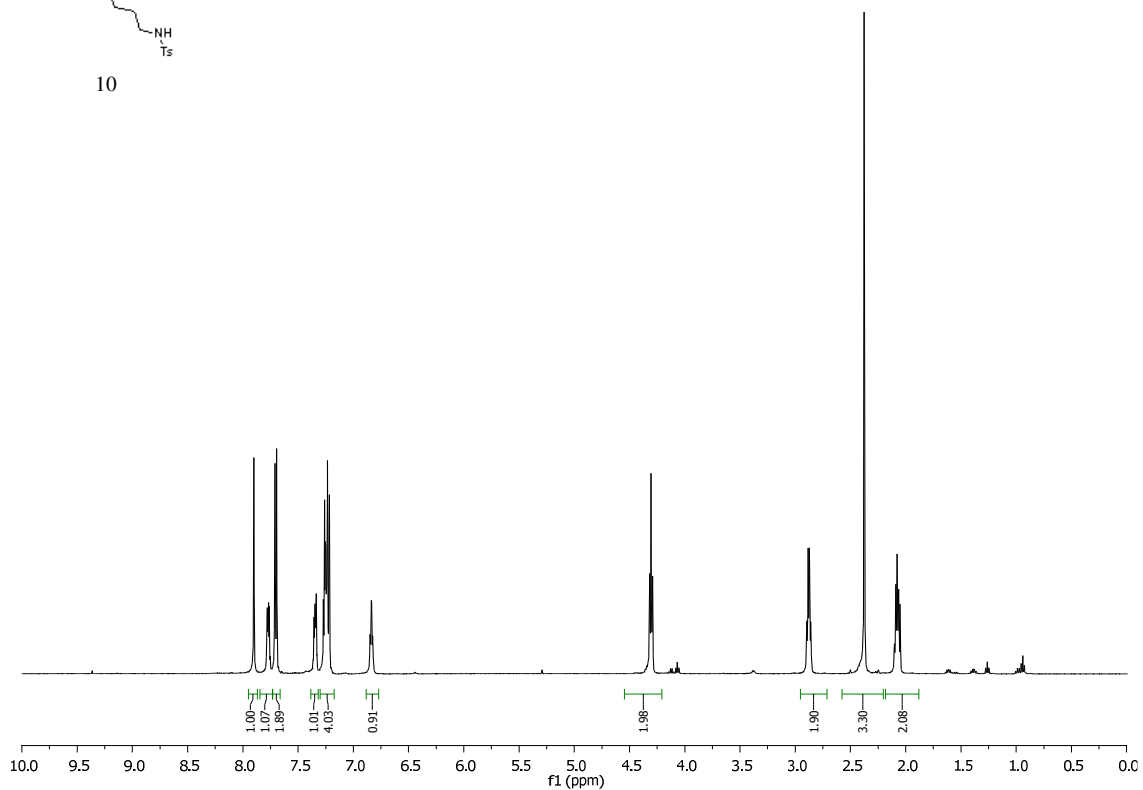

10

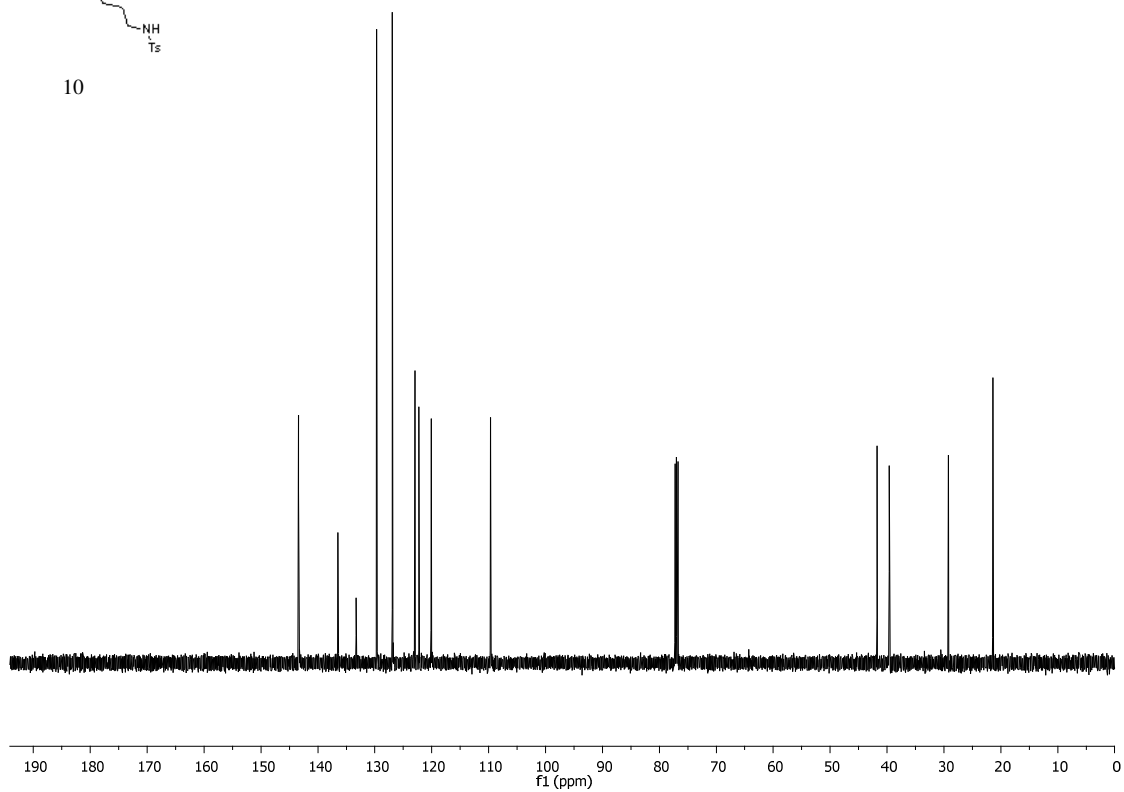

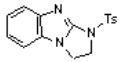

11

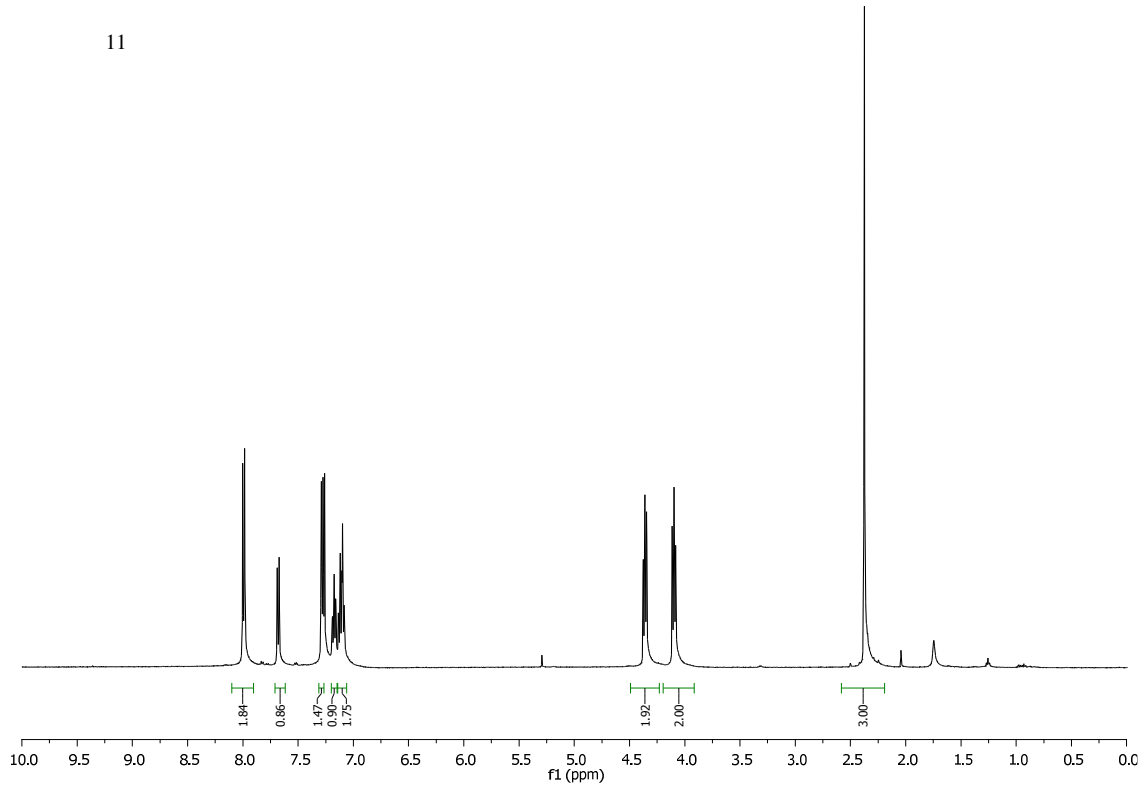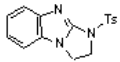

11

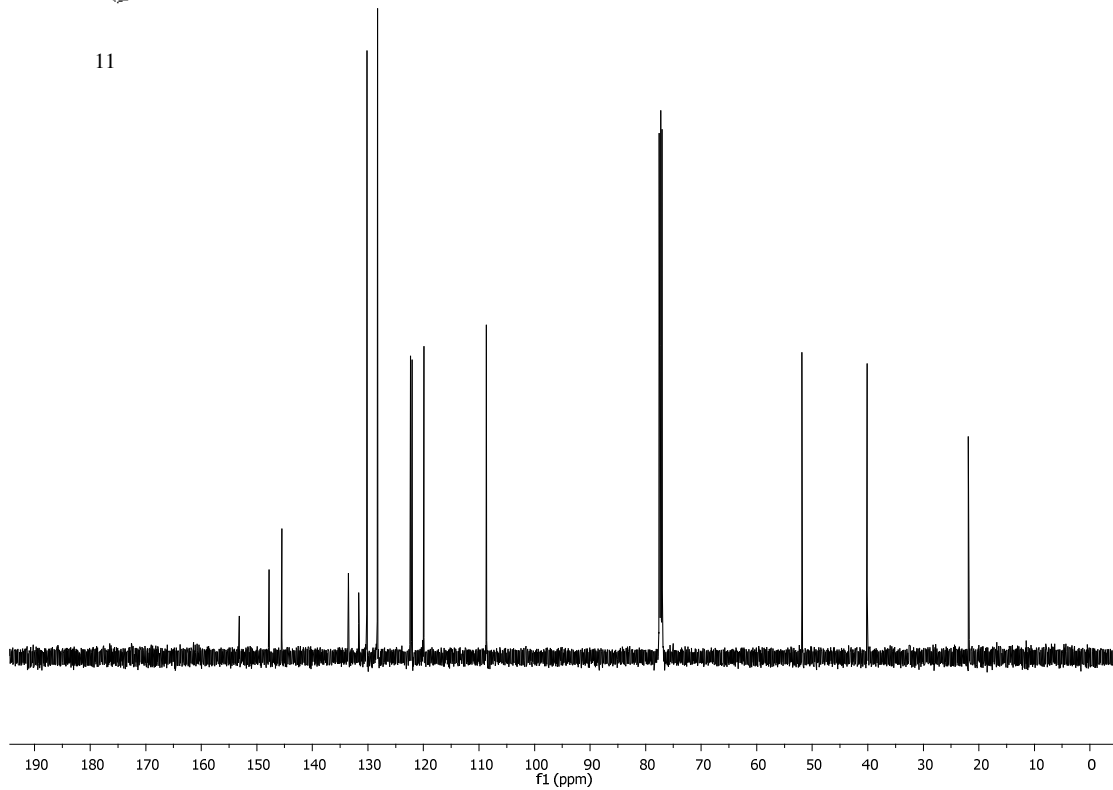



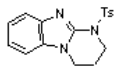

12

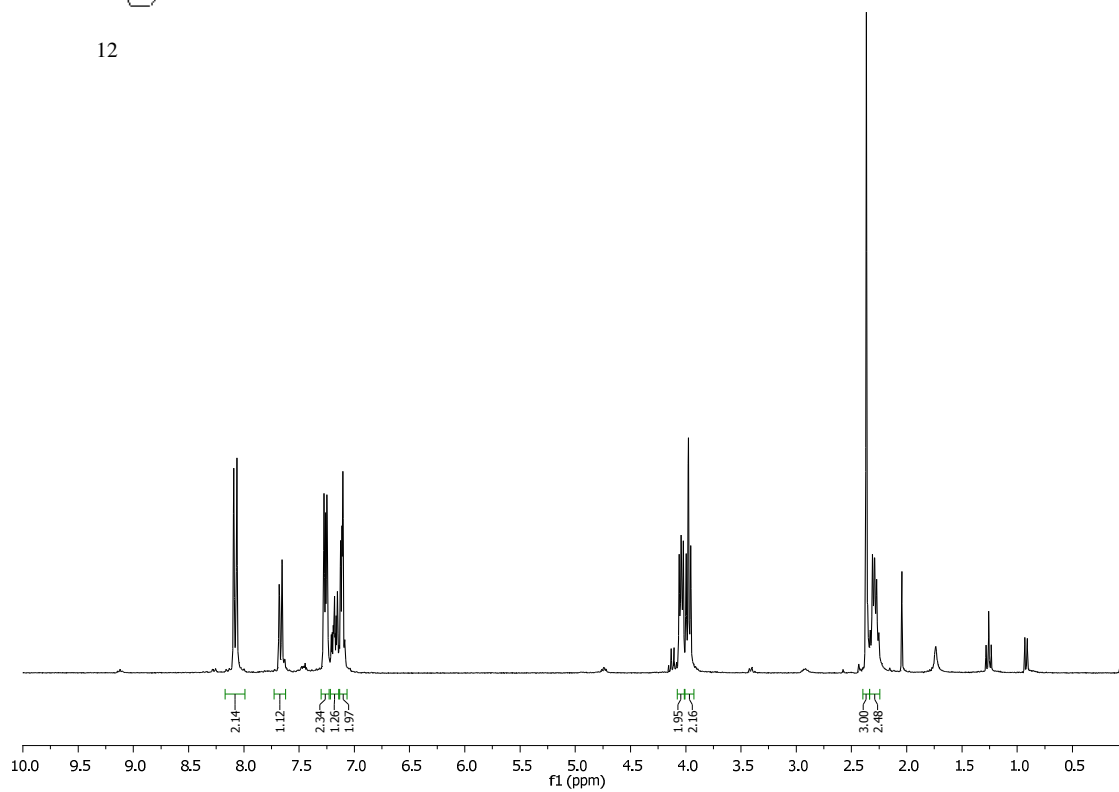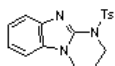

12

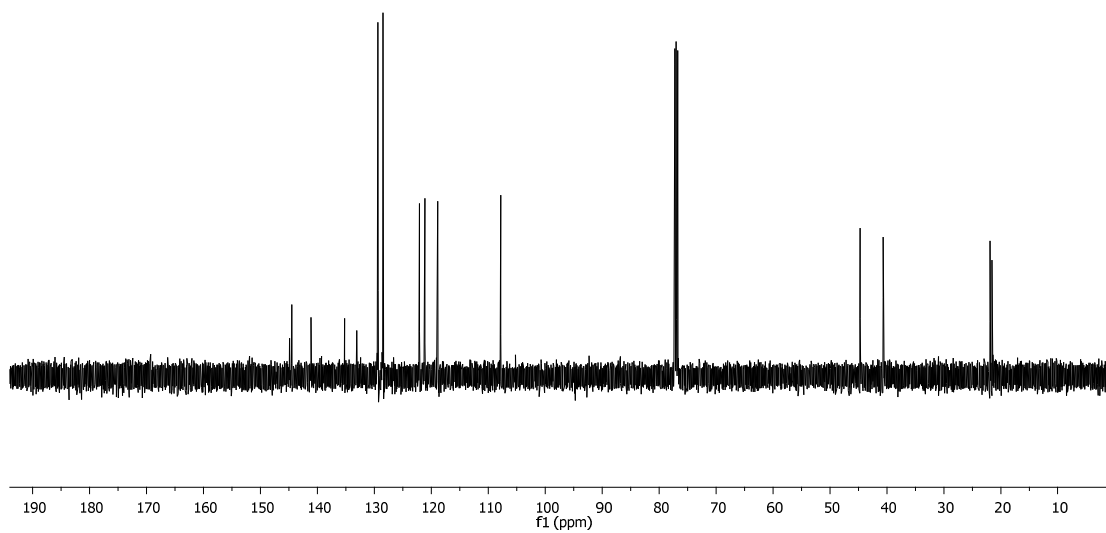

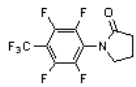

13a

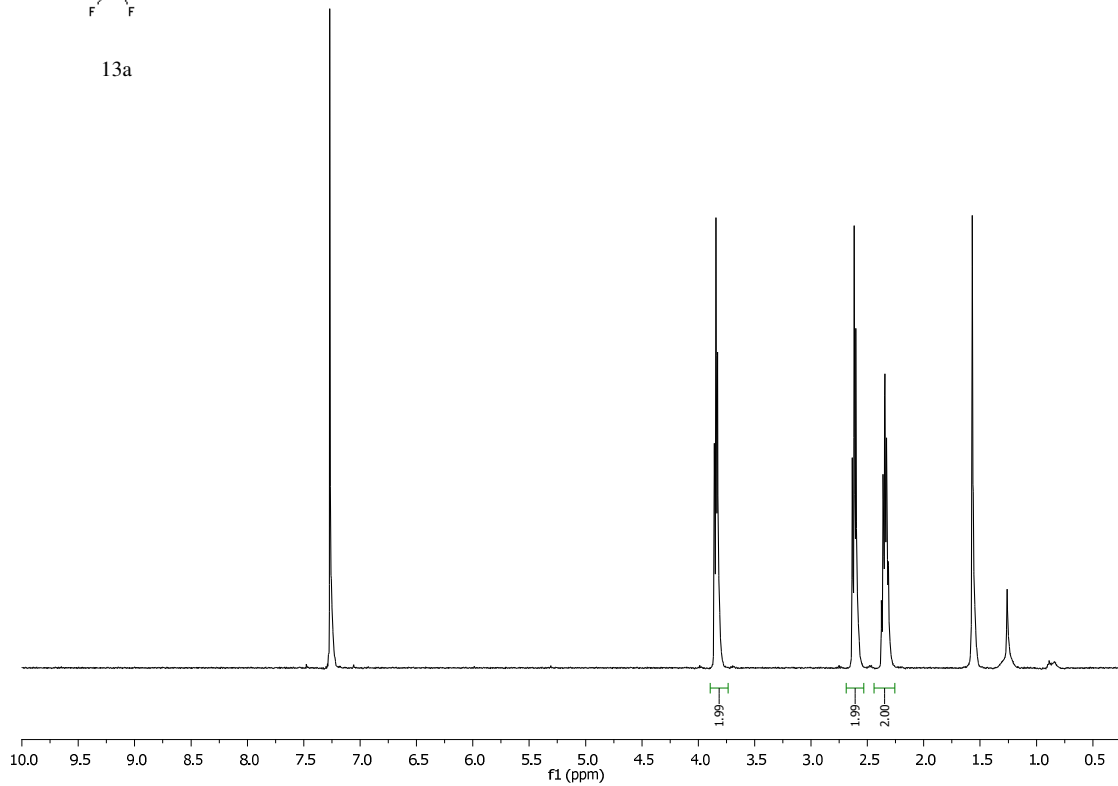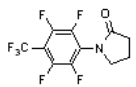

13a

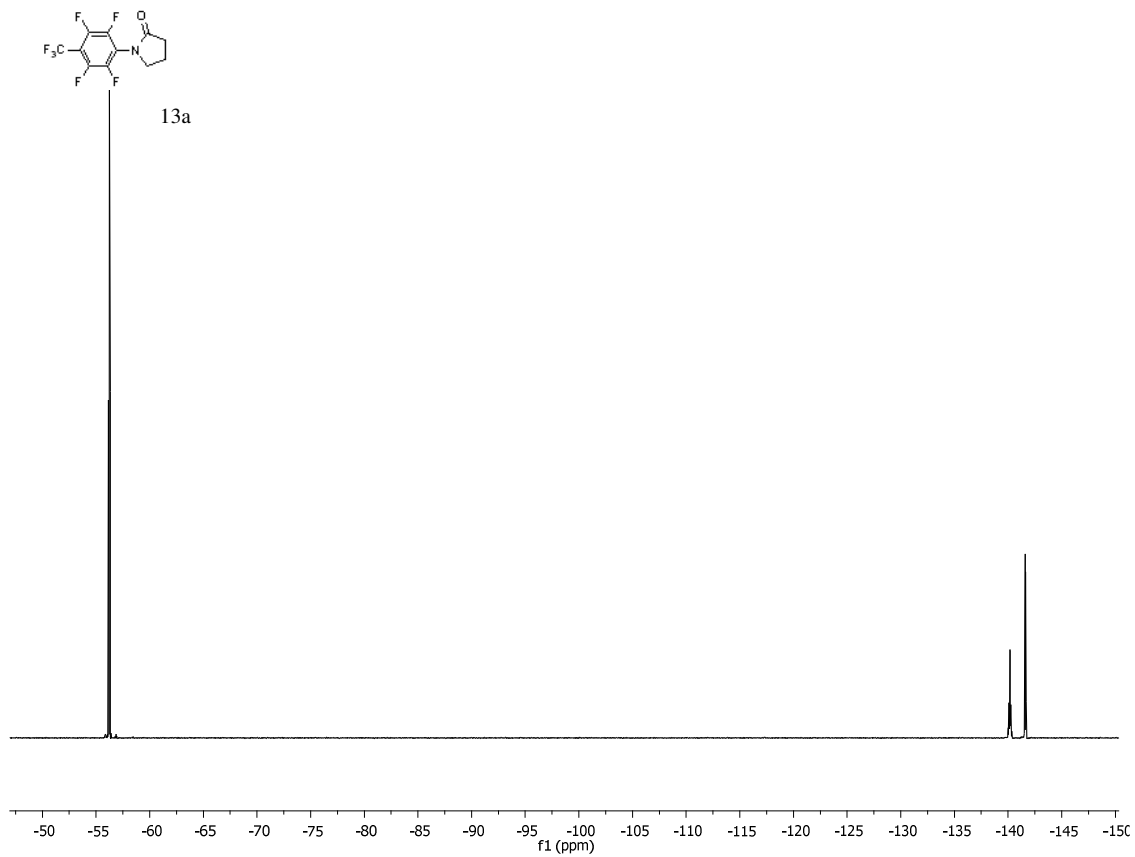

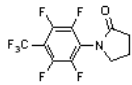

13a

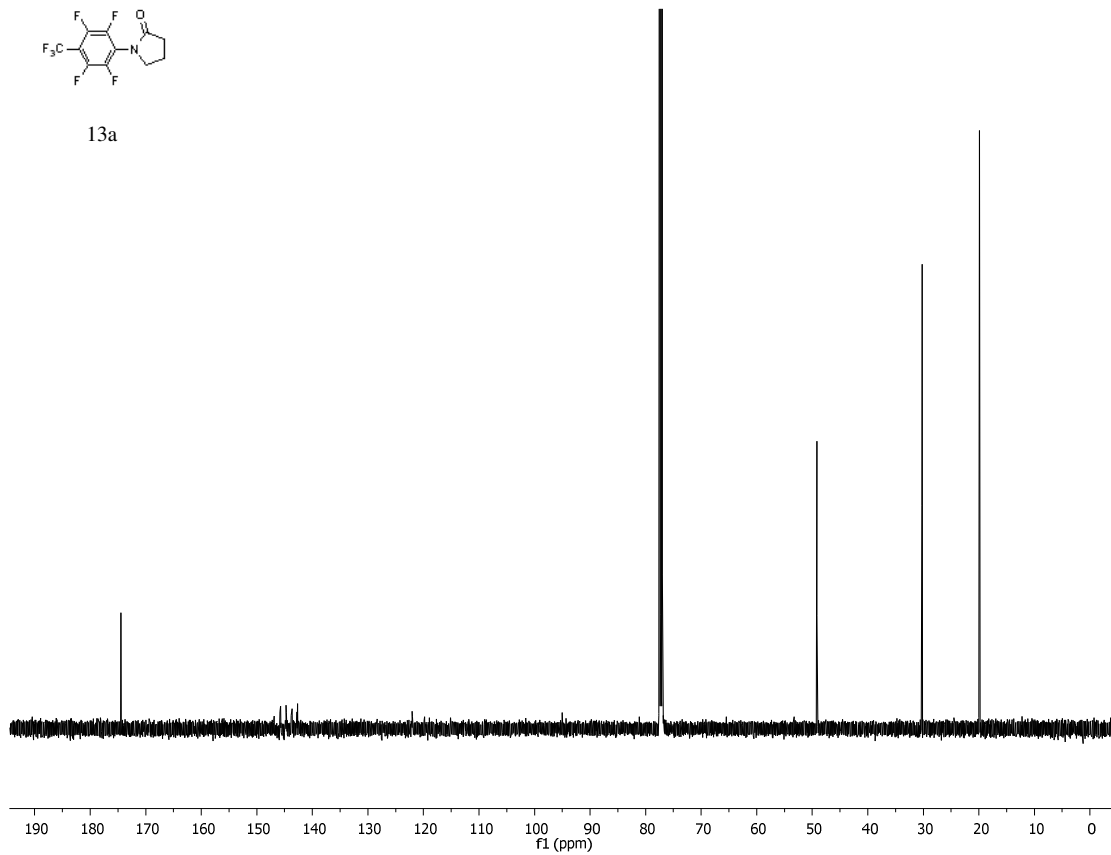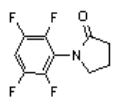

14a

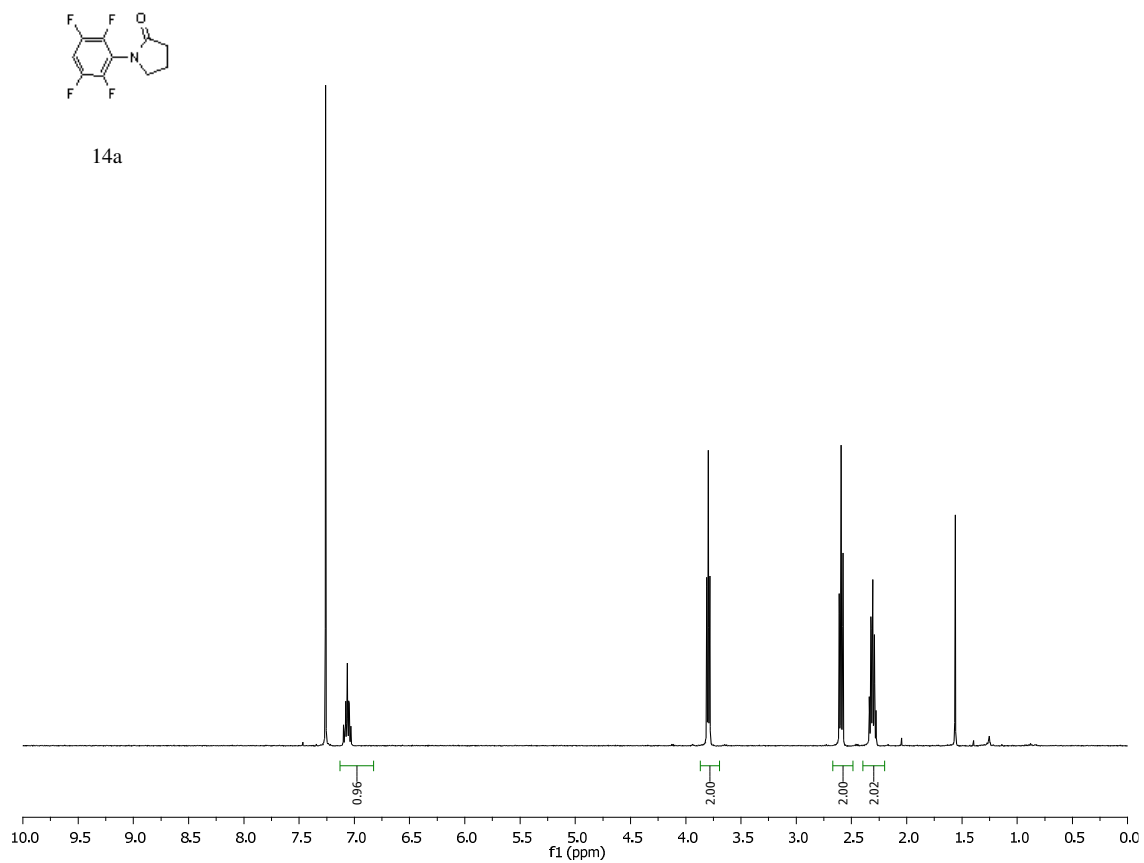

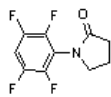

14a

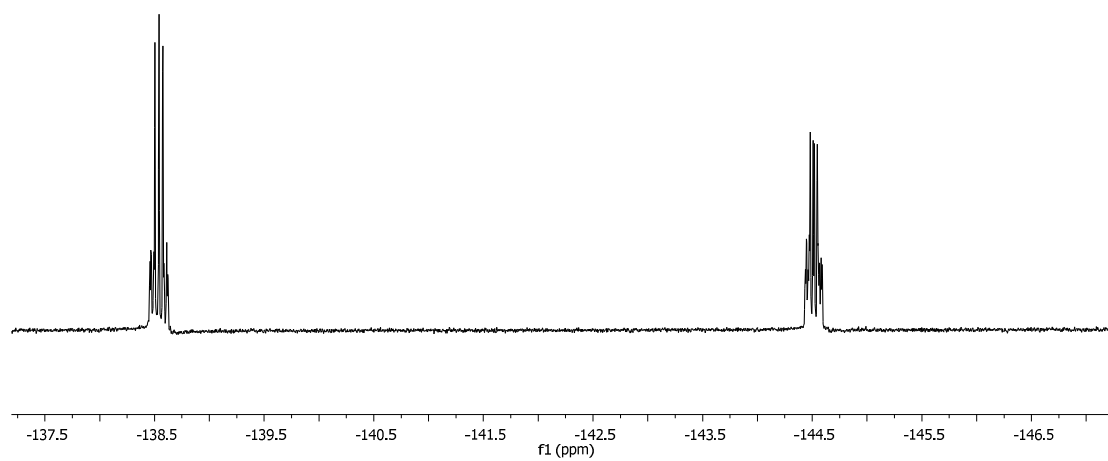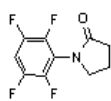

14a

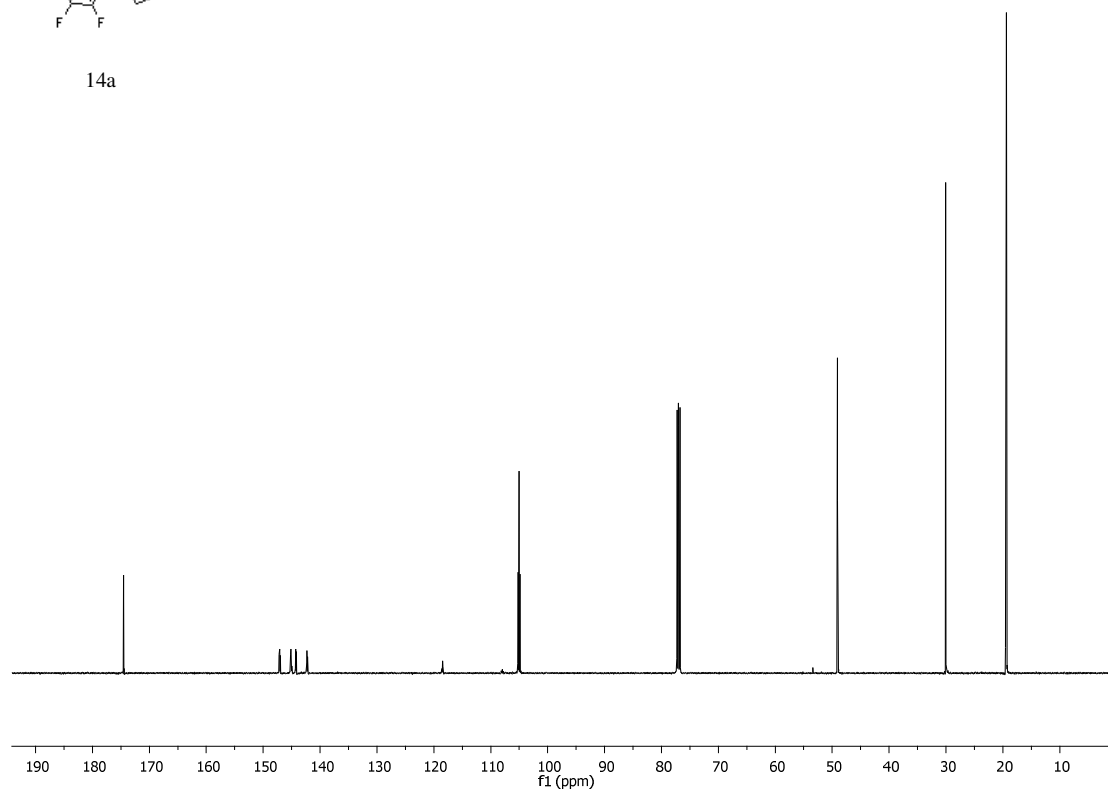

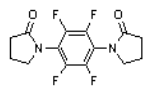

14aa

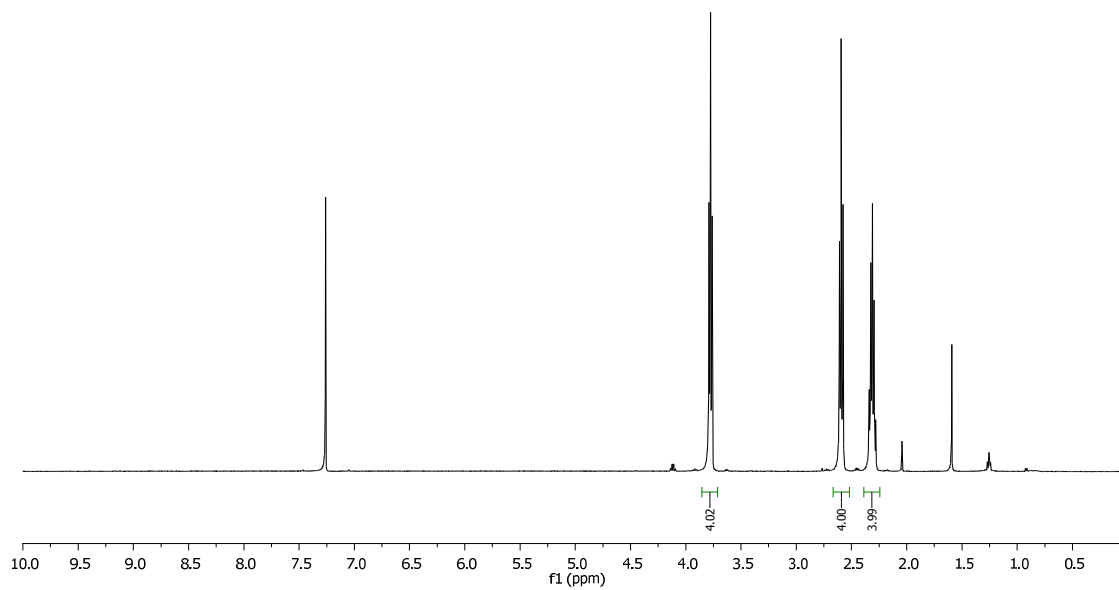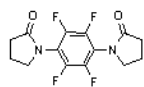

14aa

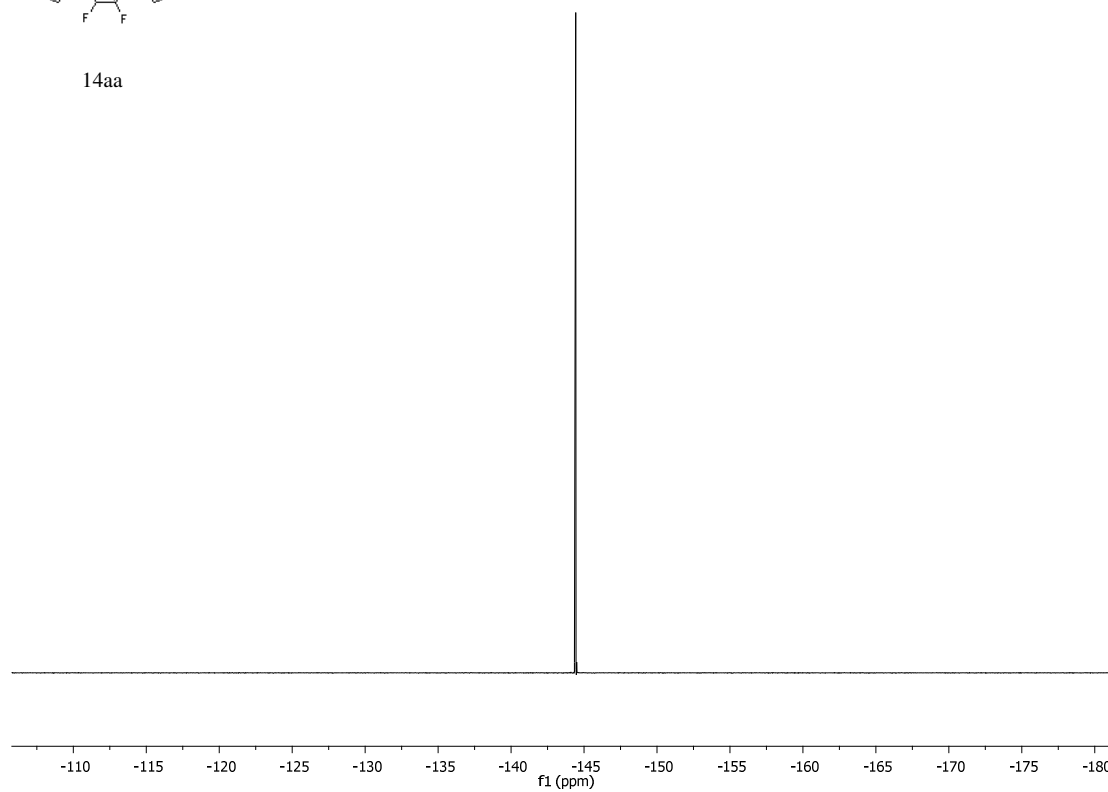

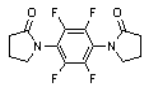

14aa

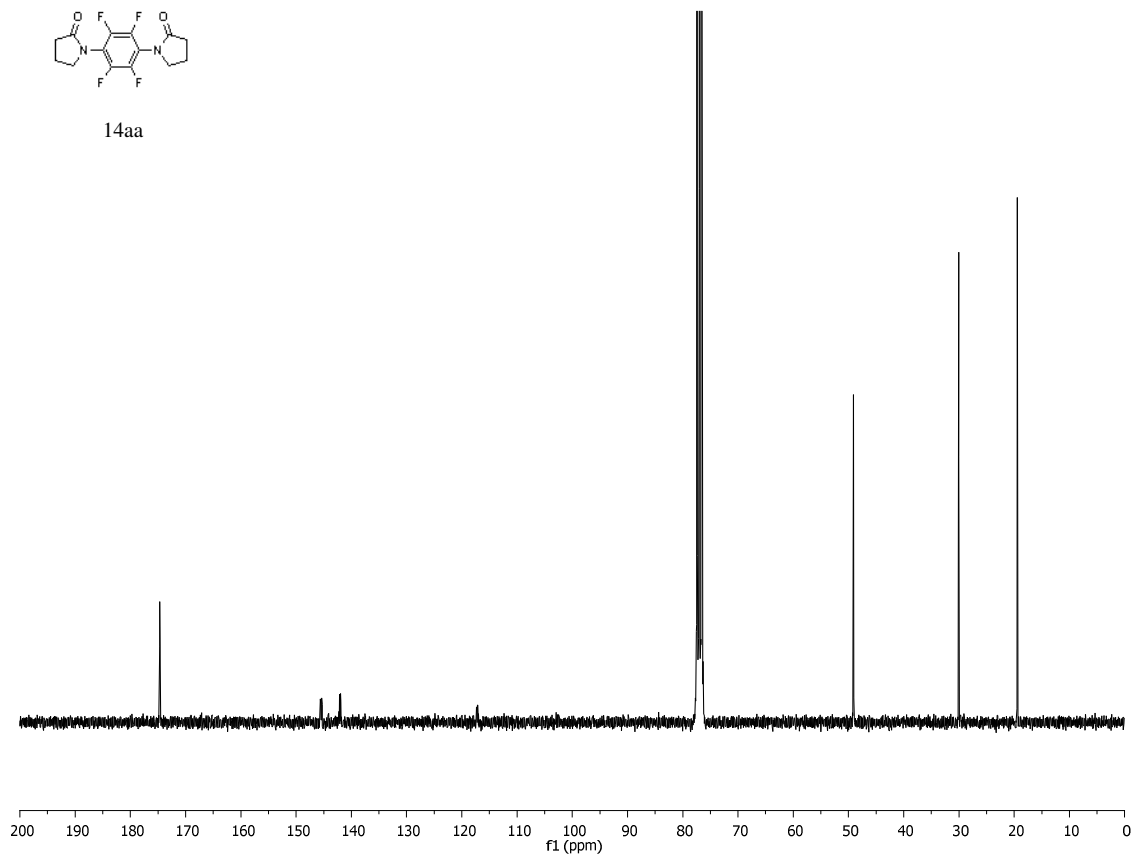

Supplement: ol902079g_si_001.pdf [file ol902079g_si_001.pdf]
